1 **Reduced mesophyll conductance by cell wall thickening and**  
2 **chloroplasts decreasing driven the decline of photosynthesis under**  
3 **sole NH<sub>4</sub><sup>+</sup> supply**

4 Yiwen Cao, Yonghui Pan, Tianheng Liu, Min Wang, Shiwei Guo\*

5 Jiangsu Provincial Key Lab for Organic Solid Waste Utilization; National Engineering  
6 Research Center for Organic-based Fertilizers; Jiangsu Collaborative Innovation  
7 Center for Solid Organic Waste Resource Utilization; Nanjing Agricultural University,  
8 Weigang 1, Nanjing 210095, China

9 \* Corresponding author: E-mail, [sguo@njau.edu.cn](mailto:sguo@njau.edu.cn); Fax, +86-25-84396393

10

11 Yiwen Cao: [2020203071@stu.njau.edu.cn](mailto:2020203071@stu.njau.edu.cn)

12 Yonghui Pan: [pyh2014@webmail.hzau.edu.cn](mailto:pyh2014@webmail.hzau.edu.cn)

13 Tianheng Liu: [2020803194@stu.njau.edu.cn](mailto:2020803194@stu.njau.edu.cn)

14 Min Wang: [minwang@njau.edu.cn](mailto:minwang@njau.edu.cn)

15 Shiwei Guo: [sguo@njau.edu.cn](mailto:sguo@njau.edu.cn)

16

17 The date of submission: 5 January 2022

18 The number of tables and figures: 3 and 6, respectively

19 Word count: 3554

20

21

22 Highlight: Cell wall and chloroplast variability determining the mesophyll  
23 conductance under different nitrogen forms

24 **Abstract:** The relationship between nitrogen (N) sources and photosynthetic capacity  
25 of leaf differs between species. However, the leaf anatomical variabilities related to  
26 photosynthesis ( $A$ ) of shrubs under different forms of N remain imperfectly known.  
27 Here, *Lonicera Japonica* (a shrub) was grown hydroponically in the presence of three  
28 forms of N (sole  $\text{NH}_4^+$ , 50%/50%  $\text{NH}_4^+/\text{NO}_3^-$  and sole  $\text{NO}_3^-$ ).  $A$  and photosynthetic N  
29 use efficiency significantly decreased under sole  $\text{NH}_4^+$  supply, in parallel with  
30 down-regulated stomatal conductance ( $g_s$ ), mesophyll conductance ( $g_m$ ), and electron  
31 transfer rate ( $J$ ). Up to the total  $A$  decline of 41.28% in sole  $\text{NH}_4^+$  supply (compare  
32 with sole  $\text{NO}_3^-$ ), the  $g_m$  attributed to 60.3% of the total limitations. Besides, the  
33 decreased internal air space explained the increase of gas-phase resistance, and the  
34 increased liquid-phase resistance in sole  $\text{NH}_4^+$  supply was ascribed to the thicker cell  
35 wall thickness ( $T_{cw}$ ) and decreased chloroplasts exposed surface area per unit leaf area  
36 ( $S_c/S$ ). The discrepancy of  $S_c/S$  could be interpreted by the altered chloroplasts  
37 numbers and the distance between adjacent chloroplasts ( $D_{chl-chl}$ ). These results  
38 indicate the alteration of  $T_{cw}$  and chloroplast numbers were the main causes of the  
39 difference in  $g_m$  in coping with varied N sources.

40 **Key words:** Ammonium; leaf anatomy; *Lonicera Japonica*; mesophyll conductance;  
41 N form; nitrate; photosynthetic limitations; shrub

## 42 **Introduction**

43 *Lonicera Japonica* is a widespread semi-deciduous shrub species of the  
44 Caprifoliaceae family utilized in traditional medical practices (Schierenbeck, 2004;  
45 Shang *et al.*, 2011). The stomatal and photosynthetic function are suggested the key  
46 traits for enhancing yield and quality of medicinal plants, as the photosynthesis  
47 improvement could increase carbon fixation and the production of biomaterials.  
48 Mesophyll conductance ( $g_m$ ) represents the diffusion conductance to CO<sub>2</sub> in the  
49 mesophyll tissues from the sub-stomatal cavities to the carboxylation sites inside  
50 chloroplast (Peguero-Pina *et al.*, 2012), which was proposed to be the first limiting  
51 factor in photosynthesis (Lu *et al.*, 2016; Ren *et al.*, 2019).

52  $g_m$  is determined by the CO<sub>2</sub> diffusion characteristic. CO<sub>2</sub> diffusion, according to  
53 Fick's law, depends on CO<sub>2</sub> diffusivity, leaf temperature, diffusion distance, and the  
54 nature of the media in which diffusion occurs (e.g., mesophyll tissues) (Flexas *et al.*,  
55 2012), thus it is not strange that even tiny leaf anatomical traits could drive  $g_m$   
56 variability. Tholen *et al.* (2012a) had reported that altered leaf anatomy significantly  
57 influences the CO<sub>2</sub> diffusion in leaves. Leaf mass per area ( $M_A$ ) is an important  
58 integrated leaf morphological characteristic that regulates photosynthesis by  
59 influencing  $g_m$  (Niinemets, 2001; Poorter *et al.*, 2009). Early studies reported a  
60 negative correlation between  $M_A$  and  $g_m$  (Flexas *et al.*, 2008; Niinemets *et al.*, 2009b),  
61 and further in species with high  $M_A$ , photosynthesis is more limited by  $g_m$ , on average  
62 by 57% (Tomás *et al.*, 2013); analyses on the relationship between  $g_m$  and leaf  
63 density/leaf thickness, two components of  $M_A$  also corroborated this idea, despite the  
64 influences are opposite. The increase of  $M_A$  due to increased leaf density might result  
65 in a densely packed mesophyll cell, which will ultimately reduce the  $g_m$  by decreased  
66 mesophyll surface area exposed to intercellular airspace per unit leaf area ( $S_{mes}/S$ )  
67 (Flexas *et al.*, 2008; M. Weraduwaage *et al.*, 2016).

68 In the journey of CO<sub>2</sub> diffusion, the mesophyll resistance is comprised of  
69 gas-phase resistance (i.e., from the intercellular air space) and liquid-phase resistance

70 (i.e., from the cell wall, lipid membrane, cytoplasm, stroma, and chloroplast envelope).  
71 In particular, liquid-phase limitation accounts for more than 80% of the total  
72 limitation, in which the cell wall thickness ( $T_{cw}$ ) and chloroplast surface area exposed  
73 to intercellular airspace per unit leaf area ( $S_c/S$ ) are the two dominating components  
74 that affect  $g_m$  (Flexas *et al.*, 2021). There are ample studies showing a significant  
75 positive correlation between  $S_c/S$  and  $g_m$ , and the  $S_c/S$  was considered the uppermost  
76 parameter in determining  $g_m$  (Hu *et al.*, 2020; Tomás *et al.*, 2013). While the cell wall  
77 is often negligible, because it accounts for a tiny fraction of the CO<sub>2</sub> diffusion length  
78 (Carriquí *et al.*, 2020), has a comparative larger pore size and variability (Carpita *et*  
79 *al.*, 1979), and quite a static influence on photosynthesis (Evans *et al.*, 2009).  
80 Interestingly, in *Lycopodiales* (a species of fern), the accountability of  $T_{cw}$  in robust  
81 leaves of the total  $g_m$  was up to 70% (Tosens *et al.*, 2016). Other components, such as  
82 the mesophyll thickness, plasma membrane, and chloroplast density, despite not that  
83 important, also play an important role in regulating  $g_m$ , as observed in different plant  
84 species (Lu *et al.*, 2016; Niinemets *et al.*, 2009b; Veromann-Jurgenson *et al.*, 2020a;  
85 Veromann-Jurgenson *et al.*, 2020b). Overall, the leaf anatomies might vary  
86 independently and compensate for each other to achieve substantial  $g_m$  in some cases  
87 (Peguero-Pina *et al.*, 2017).

88 In fact,  $g_m$  is a rapidly adapting trait, and thus its value presents a large  
89 variability across species or environments. Up to now, mesophyll conductance to CO<sub>2</sub>  
90 had been studied on various plant species in a scale of interspecific variation and  
91 diverse environmental conditions. The review of Flexas *et al.* (2008) summarized the  
92  $g_m$  in different pooled groups of plants, which showed an apparent increasing  
93 tendency of  $g_m$  from conifers (slightly above 0.1 mol m<sup>-2</sup> s<sup>-1</sup>) to grasses (0.2-0.4 mol  
94 m<sup>-2</sup> s<sup>-1</sup>), and the semi-deciduous shrubs generally had a  $g_m$  value of 0.2-0.3 mol m<sup>-2</sup> s<sup>-1</sup>.  
95 The varying environmental conditions, such as light, water availability, salinity, and  
96 temperature had also been studied in regulating  $g_m$  (Flexas *et al.*, 2008; Niinemets *et*  
97 *al.*, 2009b; Pons *et al.*, 2009; Tosens *et al.*, 2012a). In contrast, the effects of nutrition

98 on  $g_m$ , particularly on quantitative limitations of  $g_m$  are somewhat incomplete, and  
99 only recently have the effects of nutrition (e.g., potassium, nitrogen) been reported  
100 (Gao *et al.*, 2020; Hu *et al.*, 2020; Xie *et al.*, 2020; Xiong *et al.*, 2015b). Nitrogen (N)  
101 is an important nutrition element for plant growth and photosynthesis. There is  
102 sufficient evidence of the strong interplays between the photosynthetic process and  
103 plant endogenous N status (Perchlik and Tegeder, 2018; Xiong *et al.*, 2015). N in soil  
104 is available mainly in two inorganic N sources, i.e., nitrate ( $\text{NO}_3^-$ -N) and ammonium  
105 ( $\text{NH}_4^+$ -N). Due to the different assimilation processes and energy consumption, or  
106 sometimes the toxic effect of  $\text{NH}_4^+$ , photosynthesis of species showed quite different  
107 responses/preferences to  $\text{NH}_4^+$  or  $\text{NO}_3^-$ . In some studies, the plant supplied with  $\text{NH}_4^+$   
108 was observed increased chloroplast numbers and chloroplast volume in comparison  
109 with  $\text{NO}_3^-$  (Golvano *et al.*, 1982), yet the other study observed an elevated  $S_c$ /Rubisco  
110 in  $\text{NO}_3^-$  supply (Gao *et al.*, 2020); this effect on photosynthetic capacity and  $g_m$ ,  
111 according to some studies, could be ascribed to N allocation trade-off and source-sink  
112 balance within leaves (Evans and Clarke, 2019; Hikosaka, 2004). The studies on the  
113 relative importance of N source to the response of  $g_m$  variation in a scale of leaf  
114 structural traits had been reported in herbs (Gao *et al.*, 2020) and trees (Liu *et al.*,  
115 2021), while the study on shrubs is largely lost. Moreover, major limiting factors that  
116 restrict the leaf photosynthetic capacity of *L. Japonica* under different inorganic  
117 source is largely unknown.

118 In the present study, *L. Japonica* was grown in a hydroponic experiment with  
119 three forms of N (sole  $\text{NH}_4^+$ , 50%/50%  $\text{NH}_4^+/\text{NO}_3^-$  and sole  $\text{NO}_3^-$ ) to investigate: (1)  
120 the variations of leaf photosynthesis and leaf anatomy under different inorganic  
121 nitrogen sources; (2) the crucial role of  $g_m$  on leaf photosynthesis of *L. Japonica*; (3)  
122 the impact of mesophyll conductance on leaf photosynthesis through leaf structure  
123 variations.

## 124 **Material and Methods**

### 125 **Plant material and experimental condition**

126 The hydroponic experiment was conducted in a greenhouse with a light intensity  
127 of 1000  $\mu\text{mol photons m}^{-2}\text{s}^{-1}$  at the leaf level using 14-h photoperiod and day/night  
128 temperature of 28/18°C. The experimental site is located in Nanjing (118°51'E,  
129 32°1'N), China. One-year-old seedlings of *Lonicera japonica* were transferred to a 12  
130 L rectangular plastic box (64 cm×23 cm×18 cm) and a one-half-strength mixture of  
131  $\text{NH}_4^+$  and  $\text{NO}_3^-$  nutrient solution was supplied (for composition, see below). After two  
132 weeks, the seedlings were supplied with full-strength nutrition solution for two weeks,  
133 after which the uniform seedlings were transplanted to a 12 L rectangular plastic box  
134 (64 cm×23 cm×18 cm). The nutrition solution contained 2.0 mM  $\text{MgSO}_4\cdot 7\text{H}_2\text{O}$ , 2.8  
135 mM  $\text{CaCl}_2\cdot 2\text{H}_2\text{O}$ , 1.03 mM  $\text{K}_2\text{SO}_4$ , 0.32 mM  $\text{KH}_2\text{PO}_4$ ,  $9.10\times 10^{-3}$  mM  $\text{MnCl}_2\cdot 4\text{H}_2\text{O}$ ,  
136  $0.52\times 10^{-3}$  mM  $(\text{NH}_4)_6\text{Mo}_7\text{O}_{24}\cdot 4\text{H}_2\text{O}$ ,  $37\times 10^{-3}$  mM  $\text{H}_3\text{BO}_3$ ,  $0.15\times 10^{-3}$  mM  
137  $\text{ZnSO}_4\cdot 7\text{H}_2\text{O}$ ,  $0.16\times 10^{-3}$  mM  $\text{CuSO}_4\cdot 5\text{H}_2\text{O}$ ,  $35.8\times 10^{-3}$  mM Fe-EDTA. In our  
138 preliminary experiment, plant growth was highest at a ratio of 50%/50%  $\text{NH}_4^+/\text{NO}_3^-$   
139 compared with 75%/25%  $\text{NH}_4^+/\text{NO}_3^-$  and 25%/75%  $\text{NH}_4^+/\text{NO}_3^-$  at a N level of 2.8  
140 mM. Thus, the N was supplied at 2.8 mM with three different treatments: sole  
141  $(\text{NH}_4)_2\text{SO}_4$  (A), sole  $\text{Ca}(\text{NO}_3)_2$  (N) or mixed N (combination of 50%  $(\text{NH}_4)_2\text{SO}_4$  and  
142 50%  $\text{Ca}(\text{NO}_3)_2$ , AN).  $\text{CaCl}_2$  was added to the solutions of A and AN treatment to  
143 adjust the Ca level to N treatment (2.8 mM). Dicyandiamide was added to each  
144 nutrition solution as nitrification inhibitor. The nutrition solution was aerated for  
145 1-h/1-h day/night and renewed every 4 days, while the pH was adjusted to  $6.0\pm 0.1$   
146 each day. The containers were placed randomly to prevent the position effect.

#### 147 **Gas exchange and chlorophyll fluorescence measurement**

148 Leaf gas exchange and chlorophyll fluorescence were measured simultaneously  
149 using an open gas exchange system equipped with multiphase flash (LI-6800XT;  
150 LI-COR Inc., Lincoln, NE, USA) from 8:30 to 15:00. For each treatment, new  
151 fully-expanded leaves were randomly selected for the measurements with five  
152 replications. Measurements were obtained at a leaf temperature of  $28\pm 0.5^\circ\text{C}$ ,  $\text{CO}_2$   
153 concentration inside the chamber of  $400\pm 6\ \mu\text{mol mol}^{-1}$ , and a photosynthetic photon

154 flux density (PPFD) of 1000  $\mu\text{mol photons m}^{-2} \text{s}^{-1}$ . For fluorescence parameters,  
155 steady-state fluorescence yield ( $F_s$ ) and maximum fluorescence ( $F_m'$ ) were recorded  
156 using a fluorometer chamber during a light-saturating pulse of approximately 8000  
157  $\mu\text{mol m}^{-2} \text{s}^{-1}$ . During the photosynthetic  $\text{CO}_2$  responses ( $A/C_i$  curve) measurements,  
158 the ambient  $\text{CO}_2$  concentration ( $C_a$ ) was set in a series from 400 to 300, 200, 150, 100,  
159 and 50  $\mu\text{mol CO}_2 \text{mol}^{-1}$  and then increased from 50 to 400, 600, 800, and 1000  $\mu\text{mol}$   
160  $\text{CO}_2 \text{mol}^{-1}$  at a constant PPFD of 1000  $\mu\text{mol m}^{-2} \text{s}^{-1}$  with four replicates. The  
161 maximum carboxylation rate ( $V_{\text{cmax}}$ ) was calculated according to Long and Bernacchi  
162 (2003), and the carboxylation efficiency ( $CE$ ) was estimated as the slope of the  $A/C_i$   
163 curve fitting line over a  $C_i$  range of 50-200  $\mu\text{mol mol}^{-1}$ . The effective quantum  
164 efficiency of photosystem II ( $\Phi\text{PSII}$ ) was quantified as follows:  $\Phi\text{PSII}=(F_m'-F_s)/F_m'$ .  
165 The potential electron transport rate ( $J$ ) was calculated as  $J= \Phi\text{PSII}\times\text{PPFD}\times\alpha\times\beta$ ,  
166 where  $\alpha$  is the leaf absorption and  $\beta$  is the proportion of quanta absorbed by PSII,  
167 assumed as 0.85 and 0.5, respectively. There were no differences in chlorophyll  
168 contents between A, N, and AN leaf, thus eliminating out the confounding effect of  
169 different leaf optical properties as a result of N forms among the treatments.

170 Then we estimated the mesophyll conductance ( $g_m$ ) and chloroplast  $\text{CO}_2$   
171 concentration ( $C_c$ ) by variable  $J$  method proposed by Harley *et al.* (1992).

$$g_m = \frac{A}{C_i - \frac{\Gamma^*(J+8(A+R_d))}{J-4(A+R_d)}} \quad (1)$$

$$C_c = C_i - \frac{A}{g_m} \quad (2)$$

172 where  $A$ ,  $C_i$ ,  $C_c$ , and  $J$  were calculated as described previously,  $\Gamma^*$  is the  $\text{CO}_2$   
173 compensation point in the absence of mitochondrial respiration and  $R_d$  is the  
174 mitochondrial respiration rate in the light. In this study,  $\Gamma^*$  was assumed to be 40.0  
175  $\mu\text{mol m}^{-2} \text{s}^{-1}$ , and  $R_d$ , according to the previous data, was assumed to be 1.0  $\mu\text{mol m}^{-2}$   
176  $\text{s}^{-1}$ .

## 177 Leaf physiology

178 Four new fully expanded leaves from each treatment were randomly selected and

179 pictured. The leaf area ( $A_L$ ) obtained from the picture was calculated by Image-Pro  
180 Plus (Media Cybernetics, Sliver Spring, MD, USA), after which the leaves were  
181 oven-dried at 105°C for 15 min and then dried to constant weight at 65°C and  
182 weighted. Dried leaf samples were weighed and digested with H<sub>2</sub>SO<sub>4</sub>-H<sub>2</sub>O<sub>2</sub> at 270 °C,  
183 and the leaf N concentration was determined using the digital colorimeter  
184 (AutoAnalyzer 3; Bran+Luebbe). The total chlorophyll concentration was determined  
185 according to the method proposed by Sartory and Grobbelaar (1984). Approximately  
186 0.5 g fresh leaf discs (avoiding the main vein) were extracted with 50 ml 95%(v/v)  
187 ethanol (analytically pure, Sinopharm Chemical Reagent Co., Ltd) in the dark until  
188 they were blanched (usually no more than two days). The extract solutions were used  
189 for the determination of chlorophyll *a* and *b* using a spectrophotometer (HBS-1096A,  
190 Shanghai, China) at 665 and 649 nm, respectively. The total chlorophyll was  
191 calculated as the sum of chlorophyll *a* and *b*. There were four replications for  
192 chlorophyll concentration determination.

### 193 **Quantitative limitation analysis of A**

194 To separate the relative controls on *A* resulting from the difference in stomatal  
195 conductance, mesophyll diffusion, and biochemical capacity, quantitative analysis was  
196 conducted. The limitation of *A* under different types of N forms, according to Grass  
197 and Magnani (2005), was then composed of stomatal limitation ( $S_L$ ), mesophyll  
198 conductance ( $MC_L$ ), and biochemical limitation ( $B_L$ ), which could be expressed as  
199 follows:

$$\frac{dA}{A} = l_s * \frac{dg_s}{g_s} + l_m * \frac{dg_m}{g_m} + l_b * \frac{dJ}{J} \quad (3)$$

200 where the  $l_s$ ,  $l_m$ , and  $l_b$  ( $l_s+l_m+l_b=1$ ) were the relative limitation of stomatal  
201 conductance, mesophyll diffusion and biochemical capacity, which were calculated as  
202 follows:

$$l_s = \frac{g_{tot}/g_s * \partial A / \partial C_C}{g_{tot} + \partial A / \partial C_C} \quad (4)$$



$$I_m = \frac{g_{\text{tot}}/g_m * \partial A/\partial C_c}{g_{\text{tot}} + \partial A/\partial C_c} \quad (5)$$

$$I_b = \frac{g_{\text{tot}}}{g_{\text{tot}} + \partial A/\partial C_c} \quad (6)$$

203 where the  $g_{\text{total}}$  is the total conductance to diffuse  $\text{CO}_2$  from the leaf surface (i.e.,  
204 inside the leaf boundary layer) to the carboxylation site of chloroplast, which can be  
205 calculated as  $\frac{1}{g_{\text{tot}}} = \frac{1}{g_s} + \frac{1}{g_m}$ .  $\partial A/\partial C_c$  was estimated as the slope of  $A/C_i$  curves over a  
206  $C_i$  range of 50-100  $\mu\text{mol mol}^{-1}$ .

207 Then, the limitations of  $A$  can be approximately calculated as follows:

$$S_L = I_s * \frac{g_{\text{sref}} - g_s}{g_{\text{sref}}} * 100 \quad (7)$$

$$MC_L = I_m * \frac{g_{\text{mref}} - g_m}{g_{\text{mref}}} * 100 \quad (8)$$

$$B_L = I_b * \frac{J_{\text{ref}} - J}{J_{\text{ref}}} * 100 \quad (9)$$

208 where  $g_{\text{sref}}$ ,  $g_{\text{mref}}$ , and  $J_{\text{ref}}$  are the reference values of stomatal conductance ( $g_s$ ),  
209 mesophyll conductance ( $g_m$ ), and the potential electron transport rate ( $J$ ), respectively.  
210 The reference values were obtained from the parameters from the optimal treatment  
211 from A, AN, and N. Here, we adopted the N treatment as the optimal treatment.

## 212 **Anatomical analysis**

213 After the photosynthetic parameter measurements, leaf pieces (approximately  
214 5mm×5 mm) were cut between the main veins from each of the four different plants  
215 for anatomical measurements and transmission electron microscope (TEM) analysis.  
216 For anatomical measurement, leaf segments were quickly fixed with FAA (95%  
217 ethanol: glacial acetic acid: formalin: distilled water =10:1:2:7, v/v) and dehydrated in  
218 dimethylbenzene-ethanol series. The pieces were then staining with safranin-fast  
219 green and embedded in paraffin. After cutting into 6  $\mu\text{m}$  transverse sections, the  
220 pieces were photographed at a magnification of 400× with Nikon Eclipse E100  
221 microscope equipped with a Nikon microscope camera (Nikon DS-U3). For TEM  
222 analysis, leaf materials were quickly fixed with glutaraldehyde (2.5%, v/v) in 0.1 M  
223 phosphate buffer (pH 7.4) under vacuum. Afterward, the segments were postfixed

224 with 2% osmium tetroxide and dehydrated in a graded ethanol series, followed by  
225 washing in propylene oxide. The dehydrated segments were then embedded in Epon  
226 812 resin. Ultrathin cross-sections were cut with a Power Tome-XL ultramicrotome,  
227 stained with 2% uranyl acetate, and then viewed under an H7650 transmission  
228 electron microscope (H-7650, Hitachi, Japan). Photos were taken at 2000-8000×  
229 direct magnification to measure the cell wall thickness and chloroplast characteristics.  
230 Leaf thickness ( $T_L$ ), leaf density ( $D_L$ ), leaf volume per area ( $V_A=A_L\times T_L$ ), mesophyll  
231 thickness between two epidermises ( $T_{mes}$ ), and the volume fraction of intercellular air  
232 space ( $f_{ias}$ ) were calculated according to the light and TEM micrographs. The  $D_L$  and  
233  $f_{ias}$  were determined as follows:

$$D_L = \frac{M_A}{T_L} \quad (10)$$

$$f_{ias} = 1 - \frac{\Sigma S_s}{T_{mes} W} \quad (11)$$

234 where  $M_A$  is the specific leaf weight ( $\text{mg cm}^{-2}$ ),  $\Sigma S_s$  is the total cross-section area of  
235 the mesophyll cells and  $W$  is the width of the measured framed range.

236 Chloroplast ( $S_c/S$ ) and mesophyll ( $S_{mes}/S$ ) surface area exposed to intercellular  
237 airspace per unit leaf area were also calculated from light and TEM micrographs, as  
238 reported by Evans *et al.* (1994) and Syvertsen *et al.* (1995).

$$S_{mes}/S = \frac{L_{mes}}{W} * F \quad (12)$$

$$S_c/S = \frac{L_c}{W} * F = \frac{L_c}{L_{mes}} * S_{mes}/S \quad (13)$$

239 where the  $L_{mes}$  is the total mesophyll surface length facing intercellular air space per  
240 leaf area, and  $L_c$  is the chloroplast surface length facing intercellular air space per leaf  
241 area.  $F$  is the curvature correction factor, which depends on the shape of mesophyll  
242 cell and was calculated according to Thain (1983). Briefly, according to the  
243 differences of palisade and spongy cells (i.e., cell arrangement direction and  
244 axial/length ratio),  $F$  was calculated as a weight average of spongy ( $F_1$ ) and palisade  
245 ( $F_2$ ) mesophyll distributions:

$$F_1 = \frac{1+2\bar{b}_1/\bar{a}_1}{1+4\bar{b}_1/\pi\bar{a}_1} \quad (14)$$

$$F_2 = [(\bar{a}/\bar{b}) + (1/e) \sin^{-1} e] / E \quad (15)$$

246 where  $\bar{a}$  and  $\bar{b}$  are the average of the length and thickness of the mesophyll.  $e$  is the  
247 eccentricity, and  $E$  is the elliptical integral, which were calculated as follows,  
248 respectively:

$$249 \quad e = \sqrt{1 - (\bar{a})^2 / (\bar{b})^2} \quad (16)$$

$$250 \quad E \approx \frac{\pi}{2} \left( 1 - \frac{e^2}{4} - \frac{3e^4}{64} - \frac{5e^6}{256} \right) \quad (17)$$

251 Besides, cell wall thickness ( $T_{cw}$ ), chloroplast length ( $L_{chl}$ ) and thickness ( $T_{chl}$ ),  
252 the distance between two neighboring chloroplasts ( $D_{chl-chl}$ ), chloroplast distance from  
253 the cell wall ( $L_{cyt}$ ), and the chloroplast number per mesophyll cell were measured  
254 from TEM micrographs at a 2000-8000 $\times$ . The images were analyzed with Image-Pro  
255 Plus software (Media Cybernetics, Sliver Spring, MD, USA).

#### 256 **$g_m$ modelled from anatomical characteristics**

257 To determine  $g_m$ , the one-dimension gas diffusion model modified by Tomas *et*  
258 *al.* (2013) was applied in this study.  $g_m$ , a composite conductance, is shared by  
259 different leaf anatomical characteristics and decided by within-leaf gas and liquid  
260 components:

$$261 \quad g_m = \frac{1}{\frac{1}{g_{ias}} + \frac{RT_k}{H^* g_{liq}}} \quad (18)$$

262 where  $g_{ias}$  is the gas-phase conductance which stands for the gas-phase pathway from  
263 substomatal cavities to the outer surface of cell wall, and  $g_{liq}$  is the liquid conductance  
264 that from the outer surface of cell wall to chloroplast.  $R$  is the gas constant ( $\text{Pa m}^3 \text{K}^{-1}$   
265  $\text{mol}^{-1}$ ),  $T_k$  is the absolute temperature (K), and  $H$  is the Henry's law constant ( $\text{Pa m}^3$   
266  $\text{mol}^{-1}$ ). Due to the  $g_m$  in this equation, is defined as a gas-phase conductance, thus  
267  $H/RT_k$  (dimensionless form of Henry's constant) is needed to convert to  $g_{liq}$  to the  
268 corresponding gas-phase equivalent conductance (Niinemets and Reichstein, 2003).

268 In this model, gas-phase conductance depends on gas-phase porosity ( $f_{ias}$ ) and

269 effective diffusion path in the gas-phase ( $\Delta L_{ias}$ ):

$$g_{ias} = \frac{1}{r_{ias}} = \frac{D_a * f_{ias}}{\Delta L_{ias} * \zeta} \quad (19)$$

270 where  $\zeta$  is the diffusion path tortuosity ( $m\ m^{-1}$ ) and  $Da$  ( $m^2\ s^{-1}$ ) is the diffusion  
271 coefficient for  $CO_2$  in the gas-phase ( $1.51 \times 10^{-5}$  at  $25^\circ C$ ).  $\Delta L_{ias}$  is taken as half of the  
272 mesophyll thickness ( $T_{mes}$ ).

273 The total liquid-phase diffusion conductance was determined by different  
274 components in mesophyll cell, including the conductance in the cell wall ( $g_{cw}$ ),  
275 plasma membrane ( $g_{st}$ ), cytosol ( $g_{cyt}$ ), chloroplast envelope ( $g_{en}$ ), and stroma ( $g_{st}$ ).  
276 Thus, the  $g_{liq}$  was given as:

$$g_{liq} = \frac{S_c}{(r_{cw} + r_{pl} + r_{cyt} + r_{en} + r_{st})S} \quad (20)$$

277 where  $r_{cw}$ ,  $r_{pl}$ ,  $r_{cyt}$ ,  $r_{en}$ ,  $r_{st}$  are the reciprocal term of  $g_{cw}$ ,  $g_{st}$ ,  $g_{cyt}$ ,  $g_{en}$ ,  $g_{st}$ , respectively.  
278 Alternatively, according to Tholen *et al.*(2012b), the  $CO_2$  diffusion inside the cell in  
279 different ways: one for cell wall parts with chloroplast ( $g_{cel,1}$ ), and the other for  
280 inter-chloroplast areas ( $g_{cel,2}$ ), and the corresponding resistance was expressed as  $r_{cel,1}$   
281 and  $r_{cel,2}$ . Thus, the equation of  $g_{liq}$  was converted as:

$$g_{liq} = \frac{S_{mes}}{(r_{cw} + r_{pl} + r_{cel,1} + r_{cel,2})S} \quad (21)$$

282 In addition, the conductance of liquid-phase diffusion pathway, either for cell  
283 wall ( $g_{cw}$ ), cytosol ( $g_{cyt}$ ), or stroma conductance ( $g_{st}$ ) is given as follows:

$$g_i = \frac{1}{r_i} = \frac{r_{fi} * D_w * p_i}{\Delta L_i} \quad (22)$$

285 where  $r_{fi}$  (dimensionless factor) accounts for the decrease of  $CO_2$  diffusion in the  
286 aqueous phase compared with free diffusion in water and was taken as 1.0 for cell  
287 wall and 0.3 for cytosol and stroma, as reported by Rondeau-Mouro *et al.*(2018) and  
288 Niinemets *et al.*(2003).  $\Delta L_i$  (m) is the diffusion path length in the corresponding  
289 component of the diffusion pathway, and  $p_i$  ( $m^3\ m^{-3}$ ) is the effective porosity in the  
290 given part. The value of  $p_i$  was set to 1.0 for cytosol and stroma, and 0.29 for the cell  
291 wall.  $D_w$  is the  $CO_2$  diffusion coefficient in aqueous phase ( $1.79 \times 10^{-9}\ m^2\ s^{-1}$  at  $25^\circ C$ ).  
292 Besides, conductance of plasma membrane ( $g_{pl}$ ) and chloroplast envelope ( $g_{env}$ ) was

293 assumed as constant value of  $0.0035 \text{ m s}^{-1}$  (Evans *et al.*, 1994; Tosens *et al.*, 2012b).

#### 294 **The quantitation of the anatomical limitation of the $g_m$**

295 The determinants of  $g_m$  were shared by gas-phase conductance ( $l_{ias}$ ) and  
296 liquid-phase conductance ( $l_i$ ). The proportion limited by  $l_{ias}$  was calculated as:

$$l_{ias} = \frac{g_m}{g_{ias}} \quad (23)$$

297 The share of  $g_m$  by the cellular-phase conductance ( $l_i$ ), which stands for the  
298 limitation of cell wall, the plasmalemma, and inside the cells was determined as:

$$l_i = \frac{g_m}{g_i * \frac{S_{mes}}{S}} \quad (24)$$

299 where  $g_i$  is the component diffusion conductance of the corresponding pathways. The  
300 fraction of exposed cell wall area lined with chloroplasts and fraction free of  
301 chloroplast were used to weighted limitations imposed by different cellular  
302 components (cytoplasm, chloroplast envelope, and stroma).

#### 303 **Statistical analysis**

304 Statistical analysis was conducted with SPSS 25.0 (SPSS Inc., Chicago, IL,  
305 USA). All data were subjected to a one-way analysis of variance (ANOVA), and the  
306 significant differences between treatments were compared using the least significant  
307 difference (*LSD*) at  $P < 0.05$ . Linear regression analyses were used to obtain the  
308 relationships among photosynthetic capacity and the main limiting factors, the key  
309 structural parameters and mesophyll conductance, and the values of mesophyll  
310 conductance estimated from different methods. Graphics and regression analyses were  
311 performed using Origin Pro 2021 software (Origin Lab Corporation, Northampton,  
312 MA, USA).

### 313 **Results**

#### 314 **Leaf morphology characteristics**

315 Sole  $\text{NH}_4^+$  supply significantly decreased leaf area ( $A_L$ ) and increased leaf  
316 thickness ( $T_L$ ) in comparison with sole  $\text{NO}_3^-$  and mixed N supply (Table 1).  
317 Correspondingly, the leaf volume per area ( $V_A$ ) of sole  $\text{NH}_4^+$  supply was almost half

318 of the  $V_A$  of mixed N supply. The variation in leaf density ( $D_L$ ) was 1.5-fold with sole  
319  $\text{NH}_4^+$  supply having the densest leaves ( $0.36 \text{ g cm}^{-3}$ ) and sole  $\text{NO}_3^-$  supply the least  
320 dense ( $0.27 \text{ g cm}^{-3}$ ). Notably,  $M_A$  seemed uninfluenced among the treatments. The leaf  
321 N concentration ( $N_L$ ) of sole  $\text{NO}_3^-$  supply was approximately 11% lower compared  
322 with mixed N and sole  $\text{NH}_4^+$  supply, yet the photosynthetic N use efficiency was  
323 dramatically upregulated by  $\text{NO}_3^-$  treatments.

#### 324 **Leaf physiological characteristics**

325 In comparison to sole  $\text{NH}_4^+$  supply, net photosynthetic rate ( $A$ ) was increased by  
326 both sole  $\text{NO}_3^-$  and mixed N supply, by 39.2% and 26.6%, respectively. Whilst the  
327 intercellular  $\text{CO}_2$  concentration ( $C_i$ ) seemed indifferent among the treatments,  
328 chloroplast  $\text{CO}_2$  concentration ( $C_c$ ) was significantly down-regulated by sole  $\text{NH}_4^+$   
329 supply. For the stomatal conductance ( $g_s$ ) and mesophyll conductance ( $g_m$ ), sole  $\text{NO}_3^-$   
330 and mixed N supply had higher value than sole  $\text{NH}_4^+$  supply and coincided with  
331 elevated electron transfer rate ( $J$ ) and carboxylation efficiency ( $CE$ ) (Table 2).

332 In order to ascertain the photosynthetic component that had the largest effect on  
333 net assimilation rate, we performed a correlation analysis, and the net photosynthesis  
334 rate ( $A$ ) was positively correlated with stomatal conductance ( $g_s$ ), mesophyll  
335 conductance ( $g_m$ ), and electron transport rate ( $J$ ) (Figure 2). The  $\text{CO}_2$  drawdown  
336 ( $C_i - C_c$ ) from sub-stomatal cavities ( $C_i$ ) to chloroplasts ( $C_c$ ) ranged from 86.3 to 107.3  
337  $\mu\text{mol mol}^{-1}$  and was higher in leaves with decreased  $g_m$  under sole  $\text{NH}_4^+$  supply.

#### 338 **Leaf anatomical traits**

339 Among the leaf ultrastructural characteristics estimated from TEM (Table 3;  
340 Figure 1), the mesophyll thickness ( $T_{\text{mes}}$ ), the volume fraction of intercellular air  
341 space ( $f_{\text{ias}}$ ), mesophyll surface area ( $S_{\text{mes}}/S$ ), and the chloroplast surface area ( $S_c/S$ )  
342 exposed to intercellular airspace per unit leaf area were significantly down-regulated  
343 by sole  $\text{NH}_4^+$  supply. Notably, there were marked differences in cell wall thickness  
344 ( $T_{\text{cw}}$ ) among the treatments, for sole  $\text{NO}_3^-$  supply exhibited the thinnest cell wall (0.16  
345  $\mu\text{m}$ ), while sole  $\text{NH}_4^+$  supply had the thickness cell walls with the maximum value of

346 0.25  $\mu\text{m}$ . For chloroplast characteristics, the length ( $L_{\text{chl}}$ ) and thickness ( $T_{\text{chl}}$ ) of the  
347 chloroplasts, and the distance of the chloroplast from the cell wall ( $L_{\text{cyt}}$ ) seemed  
348 unaffected by N forms supply, whereas  $\text{NH}_4^+$  supply significantly elevated the  
349 distance between adjacent chloroplasts ( $D_{\text{chl-chl}}$ ). Besides, chloroplasts amount in per  
350 sponge cell and palisade cell showed more specific changes among the treatments. In  
351 the comparison with the other treatments, chloroplasts of both sponge and palisade  
352 cell were dramatically up-regulated in sole  $\text{NO}_3^-$  supply (Supplementary Figure S1).

353 Besides,  $g_m$  was not correlated with  $T_{\text{mes}}$ , reflecting the circumstance that  $T_{\text{mes}}$   
354 seemed more invariable. The positive and significant correlation between  $g_m$  and  $S_c/S_s$ ,  
355  $f_{\text{ias}}$  were observed, combined with the negative relationship observed between  $g_m$  and  
356  $T_{\text{cw}}$  suggested the importance of anatomical components to the intercellular  $\text{CO}_2$   
357 diffusion.

#### 358 **Estimation of $g_m$ with different methods**

359 In the present study, the value of  $g_m$  was measured according to the gas exchange  
360 and chlorophyll fluorescence (Harley *et al.*, 1992), and compared with  $g_m$  modelled  
361 by  $A/C_i$  response curves (Bernacchi *et al.*, 2002) and anatomical characteristics  
362 (Tomás *et al.*, 2013). The correlation analysis indicated that the estimated  $g_m$  from  
363 different methods was mainly positively correlated (Supplementary Figure S3).  
364 However, the slope was different from unity, and the Harley *et al.*-based and Tomás *et*  
365 *al.*-based estimates of  $g_m$  were strongly correlated with a  $R^2$  of 0.76 ( $P < 0.01$ ).

#### 366 **Limiting components analyses of A**

367 The relative limitations of stomatal conductance ( $l_s$ ), mesophyll diffusion ( $l_m$ ),  
368 and biochemistry capacity ( $l_b$ ) on photosynthesis are shown in Figure 3(a). In the  
369  $\text{NO}_3^-$ -treatment and mixed N treatment, the percentages of the three limiting  
370 components are relatively close, and  $l_b$  (36.4% and 39.5%, respectively) accounts for  
371 the most important relative limitation of photosynthesis. While for sole  $\text{NH}_4^+$  supply,  
372 the relative limitation of  $l_s$ ,  $l_m$ , and  $l_b$  significantly varied, and the  $l_m$  (44.2%) was  
373 considered more important of photosynthesis, followed by  $l_s$  (30.8%) and  $l_b$  (25.0%).

374 Meanwhile, according to quantitative limitations analysis of  $A$ , mesophyll  
375 conductance limitation ( $MC_L$ ) was the highest constrain of  $A$  under sole  $NH_4^+$  supply,  
376 accounting for the 24.39 % of  $A$  decline compared with the  $NO_3^-$  treatment (Figure 3).

### 377 **Key structural factors regulating $A$ through $g_m$**

378 For the different components of the whole  $CO_2$  diffusion pathway, restrictions in  
379 liquid-phase  $CO_2$  conductance were the dominant limiting factors on  $g_m$ , accounting  
380 for approximately 90% of the total limitation (Figure 4b). Among the different  
381 components of the liquid-phase, the stroma limitation was the main limiting factor in  
382 the liquid-phase, whereas the stroma limitation seemed unaffected by the treatments.  
383 The liquid-phase limiting component of  $g_m$  is also associated with the cytoplasm, with  
384 significantly upregulated by sole  $NH_4^+$  supply. In comparison with the sole  $NH_4^+$   
385 supply, plasma membrane and chloroplast envelope limitation proposed a slightly  
386 higher percentage in sole  $NO_3^-$  supply, with 24.3% and 24.3%, respectively. For the  
387 absolute value of the limitations, the cell walls appeared to have a more specific  
388 change among the treatments that limited the internal diffusion of  $CO_2$  varied from  
389 303.69 to 480.37  $s\ m^{-1}$  (Figure 4a). Besides, the variation in cytoplasm resistance was  
390 1.7-fold, with sole  $NO_3^-$  treatment having the lowest resistance (450.13  $s\ m^{-1}$ ) and  
391 sole  $NH_4^+$  supply having the highest (664.23  $s\ m^{-1}$ ).

## 392 **Discussion**

### 393 **$g_m$ dominated the decrease of $A$ in sole $NH_4^+$ supply**

394 In the present study, inorganic N sources significantly decreased the  
395 photosynthetic rate ( $A$ ) of *Lonicera Japonica*. Leaf in sole  $NH_4^+$  treatment was  
396 observed a dramatically downregulated  $A$ , in parallel with a larger dropdown of  $CO_2$   
397 from the sub-stomatal cavities ( $C_i$ ) to the sites of carboxylation inside the chloroplasts  
398 ( $C_c$ ). Among the limiting factors, mesophyll conductance limitation ( $MC_L$ ) controlled  
399 60.3 % of  $A$  decline, followed by stomatal conductance ( $S_L$ , 26.4%) and biochemistry  
400 limitation ( $B_L$ , 13.3%). These results suggested the mesophyll diffusion resistance to  
401  $CO_2$  is a key limiting factor to  $A$ . Early studies suggested that  $g_m$  was driven by



402 integrated leaf characteristics, notably and negatively correlated with leaf mass per  
403 area ( $M_A$ ) (Flexas *et al.*, 2008; Han, 2011; Niinemets *et al.*, 2009a; Onoda *et al.*, 2017).  
404 Nevertheless, the  $M_A$  did not show any significant difference among treatments in this  
405 study, despite some declining tendency of sole  $\text{NO}_3^-$  treatment. Whilst the unchanged  
406  $M_A$ , the present data showed that the  $\text{NH}_4^+$ -fed leaves were manifested by higher leaf  
407 thickness ( $T_L$ ) and density ( $D_L$ ), and a smaller leaf area ( $A_L$ ) and leaf volume ( $V_A$ )  
408 (Table 1). The leaf traits are generally observed in  $\text{NH}_4^+$ -fed plants compared to those  
409 supplied with  $\text{NO}_3^-$  (Guo *et al.*, 2007), suggesting the high leaf structure plasticity and  
410 varied leaf carbon-expensive structure in relation to environmental conditions.

411 As there is ample agreement that the use of integrated traits such as  $M_A$  as  
412 proxies of  $g_m$  might not be valid in all cases, the intercellular anatomical traits that  
413 limit  $\text{CO}_2$  effective diffusion length and area, in particularly the cell wall thickness  
414 ( $T_{cw}$ ) are especially crucial (Evans *et al.*, 2009; Momayyezi and Guy, 2017; Tosens *et al.*,  
415 2012b). In the present study, a one-dimensional within-leaf gas diffusion model  
416 considering all of the leaf anatomical limitations was applied as previously modified  
417 by Tomas *et al.* (2013). The  $g_m$  modelled from anatomical traits was tightly correlated  
418 with measured  $g_m$  (Supplementary Figure S3), which, to some extent, verified the  
419 view that the variation of  $g_m$  is related to the intercellular structures involved in  $\text{CO}_2$   
420 diffusion. Nevertheless, the partial conductance components are generally assumed to  
421 be composed of a single medium in the estimation of  $g_m$ , which might be unrealistic  
422 (Gago *et al.*, 2020). In addition, the carbonic anhydrases, as well as aquaporins were  
423 not considered in the  $g_m$ -modelled (Flexas *et al.*, 2012). Consequently, the correlation  
424 between  $g_m$ -gas exchanges and  $g_m$ -modelled frequently deviates from the 1:1  
425 relationship.

426 Mesophyll conductance is a composite conductance of an intercellular gas-phase  
427 ( $g_{ias}$ ) and a liquid-phase ( $g_{liq}$ ). The  $g_{ias}$  mainly depends on the intercellular air space  
428 and mesophyll thickness, while the  $g_{liq}$  was affected by apoplast and cellular  
429 components of the  $\text{CO}_2$  pathway, which can be scaled by the chloroplast surface area

430 exposed to intercellular air space per unite leaf area ( $S_c/S$ ) (Flexas *et al.*, 2012). It was  
431 observed that the limitations were mainly represented by liquid-phase, and the  
432 gas-phase accounts for only approximately 10% (Figure 4b), analogous to the value  
433 obtained in rape (Lu *et al.*, 2016). Despite the low proportion, a significant  
434 discrepancy of  $g_{ias}$  among the treatments appeared, in that gas-phase limitation was  
435 upregulated by sole  $NH_4^+$  supply. This result was somewhat inconsistent with Liu *et al*  
436 *al* (2021) and Gao *et al* (2020), as  $NO_3^-$  caused higher limitation on  $g_{ias}$ . This could be  
437 explained by the variation of the environment light intensity, concentrations of N  
438 addition, experiment period as well as the plant species. Integrated all the  
439 determinants into account, there was a positive correlation between  $g_m$  and the volume  
440 fraction of intercellular air space ( $f_{ias}$ ) ( $R^2 = 0.71$ ,  $P < 0.01$ ), while a weak relationship  
441 with the mesophyll thickness (Figure 5), suggesting that  $f_{ias}$  was more variable in  
442 regulating  $g_m$ . Additionally,  $f_{ias}$  under sole  $NO_3^-$  supply was approximately 2-folds  
443 higher than that of sole  $NH_4^+$  supply, similar to the result of Liu *et al* (2021). The  
444 flexible  $f_{ias}$  were general in plants, which may be ascribed to acclimation-related  
445 changes, e.g., a larger  $f_{ias}$  was usually observed in more favorable growth conditions  
446 (Binks *et al.*, 2016; Muller *et al.*, 2009).

#### 447 **Structural trade-off in driving the share of A limitations**

448 As suggested in various studies,  $S_c/S$  is more influential in determining  $g_m$  across  
449 species (Loucos *et al.*, 2017; Ren *et al.*, 2019; Terashima *et al.*, 2011;  
450 Veromann-Jürgenson *et al.*, 2020; Veromann-Jurgenson *et al.*, 2017). Here, the  
451 down-regulation of  $S_c/S$  by sole  $NH_4^+$  supply was speculated to be attributed to the  
452 fewer chloroplast numbers and the lower mesophyll surface area exposed to  
453 intercellular airspace per leaf area ( $S_{mes}/S$ ) (Table 3), similar to the observation of  
454 (Carriqui *et al.*, 2015); while the length and thickness of chloroplasts were unchanged  
455 among the treatments. Despite the dropdown of  $r_{st}$ , a fact that cannot be ignored is the  
456 relative control of chloroplast stroma on  $g_{liq}$  was less affected by N forms, with no  
457 significant change among the treatments.

458        There rises a crucial concern that whether  $g_m$  was necessarily controlled by the  
459 component owning the largest proportion, because the contribution of components  
460 that limit CO<sub>2</sub> diffusion may vary among species. Here, the discrepancy in  
461 liquid-phase resistance was suggested to be related to the cytoplasm and cell wall. For  
462 cytoplasm, it accounts for approximately 15% of liquid resistance in the present study,  
463 corresponds well with previous reports (Lu *et al.*, 2016; Tosens *et al.*, 2012a; Tosens  
464 *et al.*, 2012b). Commonly, the chloroplasts are arranged against the cell periphery to  
465 absorb light and CO<sub>2</sub> (Sage *et al.*, 2009), thus the distance of chloroplast from cell  
466 wall ( $L_{\text{cyt}}$ ) could be responsible for most of the cytoplasm resistance, as reported by  
467 (Sharkey *et al.*, 1991). However,  $L_{\text{cyt}}$  was the same among the treatments (Table 3) in  
468 this study, and therefore, the upregulated  $r_{\text{cyt}}$  in NH<sub>4</sub><sup>+</sup> treatment may be explained by  
469 the increase of distance between adjacent chloroplasts ( $D_{\text{chl-chl}}$ ), by up to 50%  
470 compared with mixed N treatment.

471        Previous studies have highlighted the importance of cell wall in determining  $g_m$   
472 among species, as the cell wall could account for 50% of  $g_m$  by restricting CO<sub>2</sub>  
473 diffusion (Evans *et al.*, 2009; Terashima *et al.*, 2006). Although the limitation is often  
474 neglected, cell wall limitation sometimes is greater than  $S_c/S$ , and together these  
475 constitute the primary anatomical factors for setting the maximum  $g_m$  (Carriquí *et al.*,  
476 2019; Carriqui *et al.*, 2019). Here, the cell wall thickness ( $T_{\text{cw}}$ ) varied over a range of  
477 0.16 to 0.25  $\mu\text{m}$ , and  $T_{\text{cw}}$  of sole NO<sub>3</sub><sup>-</sup> treatment decreased by 27% to 36% in the  
478 comparison with mixed N and sole NH<sub>4</sub><sup>+</sup> supply, resulting in a dramatic difference  
479 among the treatments. Głazowska *et al.* (2019) had reported that the distinct cell wall  
480 remodeling was mediated by inorganic N supply. NH<sub>4</sub><sup>+</sup>-mediated cell wall thicken, as  
481 observed in early studies may be ascribed to changes in the contents of polysaccharide,  
482 ion, lignin, or cellulose of cell walls (Ellsworth *et al.*, 2018; Podgórska *et al.*, 2017).  
483 Meanwhile, as previously mentioned, a more rigid cell wall structure could explain  
484 the reduction in  $A_L$  in ammonium supply, by limiting cell expansion. Besides, the  $T_{\text{cw}}$   
485 and  $g_m$  were observed strongly and positively correlation in this study (Figure 5 (b),

486  $R^2 = 0.53$ ,  $P < 0.01$ ), the reduced  $g_m$  and thicker cell wall were reported to be an  
487 adaption of plant species to dry or nutrition poor environment (Niinemets *et al.*, 2009a;  
488 Niinemets *et al.*, 2009b).

489       Recent evidence points to an effect of cell wall composition on photosynthesis,  
490 possibly due to a trade-off of N allocation between chloroplasts and the cell wall in  
491 plants (Kuusk *et al.*, 2018). In angiosperms, particular in C3 plants, chloroplast N  
492 distribution accounts for almost 75 %, while the cell wall for 10% (Li *et al.*, 2017;  
493 Onoda *et al.*, 2017; Wang *et al.*, 2015); the leaf N that is not allocated to  
494 photosynthetic apparatus is generally used structurally in cell walls (Feng *et al.*, 2009).  
495 In this study, the reduced chloroplasts numbers and the thicker  $T_{cw}$  by sole  $NH_4^+$   
496 supply were speculated to be related to the down-regulated photosynthetic N  
497 allocation (Figure S1). Takashima *et al* (2004) had reported that higher N allocation to  
498 the cell wall could lead to decreased PNUE. The discrepancy of N partitioning among  
499 N sources may indicate a trade-off in the leaf photosynthetic capacity and the  
500 persistence, while the mechanism underlying this result need further research.

501

## 502 **Conclusion**

503       The present study showed that N sources significantly affected the leaf  
504 morphology and photosynthetic rate ( $A$ ) of *L. Japonica* and suggested the mesophyll  
505 diffusion resistance accounts for the most limiting of  $A$ , with more than 50%. Sole  
506  $NH_4^+$ -fed leaves were characterized by smaller leaf area, higher leaf thickness, and  
507 larger leaf density. Variations of mesophyll conductance ( $g_m$ ) under different N  
508 sources were ascribed to the leaf anatomy changes, notably the internal air space ( $f_{ias}$ ),  
509 exposed surface area of chloroplasts per unit leaf area ( $S_c/S$ ) and cell wall thickness  
510 ( $T_{cw}$ ). Ammonium treatment reduced the  $f_{ias}$  and chloroplast numbers, resulting in an  
511 increased intercellular length and inter-chloroplast length, and finally inhibition of  $g_m$   
512 and  $A$  (Figure 6).

513

514

515 **Acknowledgments**

516 This work was financially supported by the National Natural Science Foundation of  
517 China (32072673), the Fundamental Research Funds for the Central Universities  
518 (KYGD202007), the Young Elite Scientists Sponsorship Program by CAST  
519 (2018QNRC001), and the Innovative Research Team Development Plan of the  
520 Ministry of Education of China (IRT\_17R56).

521

522 **Author contributions**

523 Shiwei Guo and Yiwen Cao conceived the idea and designed the experiment;  
524 Yiwen Cao, Yonghui Pan, and Tianheng Liu completed the experiment; Yiwen Cao  
525 analyzed the data and wrote the manuscript; Shiwei Guo, Min Wang, and Yonghui  
526 Pan helped in manuscript revising; Shiwei Guo and Min Wang provided funding  
527 support. All the authors contributed critically to the drafts and gave final approval for  
528 publication.

529

530 **Conflict of interest**

531 The authors declare that the research was conducted in the absence of any  
532 commercial or financial relationships that could be construed as a potential conflict of  
533 interest.

534 **Reference**

535 **Baginsky, S. and Gruissem, W.J.** 2004. Chloroplast proteomics: potentials and  
536 challenges. *Journal of Experimental Botany* **55**, 1213-1220.

537 **Bino, R.J., De Vos, C.R., Lieberman, M., Hall, R.D., Bovy, A., Jonker, H.H.,**  
538 **Tikunov, Y., Lommen, A., Moco, S. and Levin, I.J.** 2005. The light-hyperresponsive  
539 high pigment-2dg mutation of tomato: alterations in the fruit metabolome. *New*  
540 *Phytologist* **166**, 427-438.

541 **Carpita, N., Sabularse, D., Montezinos, D. and Delmer, D.P.J.S.** 1979.  
542 Determination of the pore size of cell walls of living plant cells. *Science* **205**,  
543 1144-1147.

544 **Carriquí, M., Nadal, M., Clemente-Moreno, M.J., Gago, J., Miedes, E. and**  
545 **Flexas, J.** 2020. Cell wall composition strongly influences mesophyll conductance in  
546 gymnosperms. *The plant journal* **103**, 1372-1385.

547 **Carriqui, M., Cabrera, H.M., Conesa, M.A., et al.** 2015. Diffusional  
548 limitations explain the lower photosynthetic capacity of ferns as compared with  
549 angiosperms in a common garden study. *Plant Cell & Environment* **38**, 448-460.

550 **Carriquí, M., Douthe, C., Molins, A. and Flexas, J.** 2019. Leaf anatomy does  
551 not explain apparent short-term responses of mesophyll conductance to light and CO<sub>2</sub>  
552 in tobacco. *Physiologia Plantarum* **165**, 604-618.

553 **Carriqui, M., Roig-Oliver, M., Brodribb, T.J., et al.** 2019. Anatomical  
554 constraints to nonstomatal diffusion conductance and photosynthesis in lycophytes  
555 and bryophytes. *New Phytologist* **222**, 1256-1270.

556 **Carpita, N., Sabularse, D., Montezinos, D. and Delmer, D.P.** 1979.  
557 Determination of the pore size of cell walls of living plant cells. *Science* **205**,  
558 1144-1147.

559 **Ellsworth, P.V., Ellsworth, P.Z., Koteyeva, N.K. and Cousins, A.B.** 2018. Cell  
560 wall properties in *Oryza sativa* influence mesophyll CO<sub>2</sub> conductance. *New*  
561 *Phytologist* **219**, 66-76.

562        **Evans, J.R. and Clarke, V.C.** 2019. The nitrogen cost of photosynthesis.  
563        *Journal of Experimental Botany* **70**, 7-15.

564        **Evans, J.R., Kaldenhoff, R., Genty, B. and Terashima, I.J.** 2009. Resistances  
565        along the CO<sub>2</sub> diffusion pathway inside leaves. *Journal of Experimental Botany* **60**,  
566        2235-2248.

567        **Evans, J.R., Voncaemmerer, S., Setchell, B.A. and Hudson, G.S.** 1994. The  
568        relationship between CO<sub>2</sub> transfer conductance and leaf anatomy in transgenic tobacco  
569        with a reduced content of Rubisco. *Australian Journal of Plant Physiology* **21**,  
570        475-495.

571        **Feng, Y.L., Lei, Y.B., Wang, R.F., Callaway, R.M., Valiente-Banuet, A.,**  
572        **Inderjit, Li, Y.P. and Zheng, Y.L.** 2009. Evolutionary tradeoffs for nitrogen  
573        allocation to photosynthesis versus cell walls in an invasive plant. *Proceedings of the*  
574        *National Academy of Sciences of the United States of America* **106**, 1853-1856.

575        **Flexas, J., Barbour, M.M., Brendel, O., Cabrera, H.M., Carriquí, M.,**  
576        **Díaz-Espejo, A., Douthe, C., Dreyer, E., Ferrio, J.P. and Gago, J.J.** 2012.  
577        Mesophyll diffusion conductance to CO<sub>2</sub>: an unappreciated central player in  
578        photosynthesis. *Plant Science* **193**, 70-84.

579        **Flexas, J., Clemente-Moreno, M.J., Bota, J., Brodribb, T.J., Gago, J.,**  
580        **Mizokami, Y., Nadal, M., Perera-Castro, A.V., Roig-Oliver, M. and Sugiura, D.J.**  
581        2021. Cell wall thickness and composition are involved in photosynthetic limitation.  
582        *Journal of Experimental Botany* **72**, 3971-3986.

583        **Flexas, J., Ribas-Carbo, M., Diaz-Espejo, A., Galmes, J. and Medrano, H.**  
584        2008. Mesophyll conductance to CO<sub>2</sub>: current knowledge and future prospects. *Plant*  
585        *Cell & Environment* **31**, 602-621.

586        **Gago, J., Daloso, D., Carriquí, M., Nadal, M., Morales, M., Araújo, W.,**  
587        **Nunes-Nesi, A., Perera-Castro, A., Clemente-Moreno, M., Flexas, J.J.** 2020. The  
588        photosynthesis game is in the "inter-play": mechanisms underlying CO<sub>2</sub> diffusion in  
589        leaves. *Environmental and Experimental Botany*, **178**, 104174.

590 **Gao, L., Lu, Z., Ding, L., Xie, K., Wang, M., Ling, N. and Guo, S.** 2020.  
591 Anatomically induced changes in rice leaf mesophyll conductance explain the  
592 variation in photosynthetic nitrogen use efficiency under contrasting nitrogen supply.  
593 *BMC Plant Biology* **20**, 527.

594 **Głazowska, S., Baldwin, L., Mravec, J., Bukh, C., Fangel, J.U., Willats, W.G.**  
595 **and Schjoerring, J.K.** 2019. The source of inorganic nitrogen has distinct effects on  
596 cell wall composition in *Brachypodium distachyon*. *Journal of experimental botany*  
597 **70**, 6461-6473.

598 **Golvano, M., Felipe, M. and Cintas, A.J.** 1982. Influence of nitrogen sources  
599 on chloroplast development in wheat seedlings. *Physiologia Plantarum* **56**, 353-360.

600 **Guo, S., Zhou, Y., Shen, Q., and Zhang, F.** 2007. Effect of ammonium and  
601 nitrate nutrition on some physiological processes in higher plants-growth,  
602 photosynthesis, photorespiration, and water relations. *Plant Biology*, 9(01), 21-29.

603 **Hikosaka, K.J.** 2004. Interspecific difference in the photosynthesis–nitrogen  
604 relationship: patterns, physiological causes, and ecological importance. *Journal of*  
605 *plant research* **117**, 481-494.

606 **Hu, W., Lu, Z., Meng, F., Li, X., Cong, R., Ren, T., Sharkey, T.D. and Lu, J.**  
607 2020. The reduction in leaf area precedes that in photosynthesis under potassium  
608 deficiency: the importance of leaf anatomy. *New Phytologist* **227**, 1749-1763.

609 **Kuusk, V., Niinemets, Ü. and Valladares, F.J.** 2018. Structural controls on  
610 photosynthetic capacity through juvenile-to-adult transition and needle ageing in  
611 Mediterranean pines. *The Plant Cell* **32**, 1479-1491.

612 **Li, L., Nelson, C.J., Trösch, J., Castleden, I., Huang, S. and Millar, A.H.**  
613 2017. Protein degradation rate in *Arabidopsis thaliana* leaf growth and development.  
614 **29**, 207-228.

615 **Liu, M., Liu, X., Du, X., Korpelainen, H., Niinemets, U. and Li, C.** 2021.  
616 Anatomical variation of mesophyll conductance due to salt stress in *Populus*  
617 *cathayana* females and males growing under different inorganic nitrogen sources. *Tree*



618 *physiology* **41**, 1462-1478.

619 **Long, S.P. and Bernacchi, C.J.** 2003. Gas exchange measurements, what can  
620 they tell us about the underlying limitations to photosynthesis? Procedures and  
621 sources of error. *Journal of Experimental Botany* **54**, 2393-2401.

622 **Loucos, K.E., Simonin, K.A., Barbour, M.M.** 2017. Leaf hydraulic  
623 conductance and mesophyll conductance are not closely related within a single  
624 species. *Plant Cell & Environment* **40**, 203-215.

625 **Lu, Z., Lu, J., Pan, Y., Lu, P., Li, X., Cong, R. and Ren, T.** 2016. Anatomical  
626 variation of mesophyll conductance under potassium deficiency has a vital role in  
627 determining leaf photosynthesis. *Plant Cell & Environment* **39**, 2428-2439.

628 **M. Weraduwege, S., Kim, S.-J., Renna, L., C. Anozie, F., D. Sharkey, T. and**  
629 **Brandizzi, F.J.** 2016. Pectin methylesterification impacts the relationship between  
630 photosynthesis and plant growth. *Plant Physiology* **171**, 833-848.

631 **Momayyezi, M. and Guy, R.D.** 2017. Substantial role for carbonic anhydrase in  
632 latitudinal variation in mesophyll conductance of *Populus trichocarpa* Torr. & Gray.  
633 *Plant Cell & Environment* **40**, 138-149.

634 **Niinemets, Ü., Diaz-Espejo, A., Flexas, J., Galmes, J. and Warren, C.R.**  
635 2009a. Role of mesophyll diffusion conductance in constraining potential  
636 photosynthetic productivity in the field. *Journal of Experimental Botany* **60**,  
637 2249-2270.

638 **Niinemets, Ü., Wright, I.J. and Evans, J.R.** 2009b. Leaf mesophyll diffusion  
639 conductance in 35 Australian sclerophylls covering a broad range of foliage structural  
640 and physiological variation. *Journal of experimental botany* **60**, 2433-2449.

641 **Niinemets, Ü. and Reichstein, M.** 2003. Controls on the emission of plant  
642 volatiles through stomata: A sensitivity analysis. *Journal of Geophysical*  
643 *Research-Atmospheres* **108**.

644 **Niinemets, Ü.** 2001. Global-scale climatic controls of leaf dry mass per area,  
645 density, and thickness in trees and shrubs. *Ecology* **82**, 453-469.

- 646        **Onoda, Y., Wright, I.J., Evans, J.R., Hikosaka, K., Kitajima, K., Niinemets,**  
647 **U., Poorter, H., Tosens, T. and Westoby, M.** 2017. Physiological and structural  
648 tradeoffs underlying the leaf economics spectrum. *New Phytologist* **214**, 1447-1463.
- 649        **Peguero-Pina, J.J., Siso, S., Flexas, J., Galmes, J., Garcia-Nogales, A.,**  
650 **Niinemets, U., Sancho-Knapik, D., Saz, M.A. and Gil-Pelegrin, E.** 2017. Cell-level  
651 anatomical characteristics explain high mesophyll conductance and photosynthetic  
652 capacity in sclerophyllous Mediterranean oaks. *New Phytologist* **214**, 585-596.
- 653        **Peguero-Pina, J.J., Flexas, J., Galmes, J., Niinemets, U., Sancho-Knapik, D.,**  
654 **Barredo, G., Villarroya, D.** 2012. Leaf anatomical properties in relation to  
655 differences in mesophyll conductance to CO<sub>2</sub> and photosynthesis in two related  
656 Mediterranean *Abies* species. *Plant, Cell & Environment* **35**, 2121-2129.
- 657        **Perchlik, M. and Tegeder, M.J.** 2018. Leaf amino acid supply affects  
658 photosynthetic and plant nitrogen use efficiency under nitrogen stress. *Plant*  
659 *Physiology* **178**, 174-188.
- 660        **Podgórska, A., Burian, M., Gieczewska, K., Ostaszewska-Bugajska, M.,**  
661 **Zebrowski, J., Solecka, D. and Szal, B.J.** 2017. Altered cell wall plasticity can  
662 restrict plant growth under ammonium nutrition. *Frontiers in plant science* **8**, 1344.
- 663        **Pons, T.L., Flexas, J., Von Caemmerer, V. S., Evans, J.R., Genty, B.,**  
664 **Ribas-Carbo, M. and Bruognoli, E.J.** 2009. Estimating mesophyll conductance to  
665 CO<sub>2</sub>: methodology, potential errors, and recommendations. *Journal of Experimental*  
666 *Botany* **60**, 2217-2234.
- 667        **Poorter, H., Niinemets, Ü., Poorter, L., Wright, I.J. and Villar, R.J.** 2009.  
668 Causes and consequences of variation in leaf mass per area (LMA): a meta-analysis.  
669 *New phytologist* **182**, 565-588.
- 670        **Ren, T., Weraduwage, S.M. and Sharkey, T.D.** 2019. Prospects for enhancing  
671 leaf photosynthetic capacity by manipulating mesophyll cell morphology. *Journal of*  
672 *Experimental Botany* **70**, 1153-1165.
- 673        **Rondeau-Mouro, C., Defer, D., Leboeuf, E. and Lahaye, M.** 2008.

674 Assessment of cell wall porosity in *Arabidopsis thaliana* by NMR spectroscopy.  
675 *International Journal of Biological Macromolecules* **42**, 83-92.

676 **Sage, T.L. and Sage, R.F.** 2009. The functional anatomy of rice leaves:  
677 implications for refixation of photorespiratory CO<sub>2</sub> and efforts to engineer C4  
678 photosynthesis into rice. *Plant and Cell Physiology* **50**, 756-772.

679 **Sartory, D.P. and Grobbelaar, J.U.** 1984. Extraction of chlorophyll a from  
680 freshwater phytoplankton for spectrophotometric analysis. *Hydrobiologia* **114**,  
681 177-187.

682 **Schierenbeck, K.A.** 2004. Japanese honeysuckle (*Lonicera japonica*) as an  
683 invasive species; History, ecology, and context. *Critical Reviews in Plant Sciences* **23**,  
684 391-400.

685 **Shang, X.F., Pan, H., Li, M.X., Miao, X.L. and Ding, H.** 2011. *Lonicera*  
686 *japonica* Thunb.: Ethnopharmacology, phytochemistry and pharmacology of an  
687 important traditional Chinese medicine. *Journal of Ethnopharmacology* **138**, 1-21.

688 **Sharkey, T.D., Vasse, T.L., Vanderveer, P.J. and Vierstra, R.D.** 1991. Carbon  
689 metabolism enzymes and photosynthesis in transgenic tobacco (*Nicotiana tabacum* L.)  
690 having excess phytochrome. *Planta* **185**, 287-296.

691 **Syvertsen, J.P., Lloyd, J., McConchie, C., Kriedemann, P.E. and Farquhar,**  
692 **G.D.** 1995. On the relationship between leaf anatomy and CO<sub>2</sub> diffusion through the  
693 stomesophyll of hypostomatous leaves. *Plant Cell & Environment* **18**, 149-157.

694 **Terashima, I., Hanba, Y.T., Tazoe, Y., Vyas, P. and Yano, S.J.** 2006. Irradiance  
695 and phenotype: comparative eco-development of sun and shade leaves in relation to  
696 photosynthetic CO<sub>2</sub> diffusion. *Journal of Experimental Botany* **57**, 343-354.

697 **Terashima, I., Hanba, Y.T., Tholen, D. and Niinemets, Ü.** 2011. Leaf  
698 Functional Anatomy in Relation to Photosynthesis. *Plant Physiology* **155**, 108-116.

699 **Thain, J.J.** (1983) Curvature correction factors in the measurement of cell  
700 surface areas in plant tissues. *Journal of Experimental Botany* **34**, 87-94.

701 **Tholen, D., Boom, C. and Zhu, X.-G.** 2012a. Opinion: Prospects for improving

- 702 photosynthesis by altering leaf anatomy. *Plant Science* **197**, 92-101.
- 703 **Tholen, D., Ethier, G., Genty, B., Pepin, S. and Zhu, X.G.** 2012b. Variable  
704 mesophyll conductance revisited: theoretical background and experimental  
705 implications. *Plant Cell & Environment* **35**, 2087-2103.
- 706 **Tomás, M., Flexas, J., Copolovici, L., Galmés, J., Hallik, L., Medrano, H.,**  
707 **Ribas-Carbó, M., Tosens, T., Vislap, V. and Niinemets, Ü.** 2013. Importance of leaf  
708 anatomy in determining mesophyll diffusion conductance to CO<sub>2</sub> across species:  
709 quantitative limitations and scaling up by models. *Journal of Experimental Botany* **64**,  
710 2269-2281.
- 711 **Tosens, T., Niinemets, U., Vislap, V., Eichelmann, H. and Diez, P.C.** 2012a.  
712 Developmental changes in mesophyll diffusion conductance and photosynthetic  
713 capacity under different light and water availabilities in *Populus tremula*: how  
714 structure constrains function. *Plant Cell & Environment* **35**, 839-856.
- 715 **Tosens, T., Niinemets, U., Westoby, M. and Wright, I.J.** 2012b. Anatomical  
716 basis of variation in mesophyll resistance in eastern Australian sclerophylls: news of a  
717 long and winding path. *Journal of Experimental Botany* **63**, 5105-5119.
- 718 **Tosens, T., Nishida, K., Gago, J., et al.** 2016. The photosynthetic capacity in 35  
719 ferns and fern allies: mesophyll CO<sub>2</sub> diffusion as a key trait. *New Phytologist* **209**,  
720 1576-1590.
- 721 **Veromann-Jürgenson, L.-L., Brodribb, T.J., Niinemets, Ü. and Tosens, T.J.**  
722 2020. Variability in the chloroplast area lining the intercellular airspace and cell walls  
723 drives mesophyll conductance in gymnosperms. *Journal of Experimental Botany* **71**,  
724 4958-4971.
- 725 **Veromann-Jurgenson, L.L., Brodribb, T.J., Niinemets, Ü. and Tosens, T.**  
726 2020a. Pivotal Role of Mesophyll Conductance in Shaping Photosynthetic  
727 Performance across 67 Structurally Diverse Gymnosperm Species. *International*  
728 *Journal of Plant Sciences* **181**, 116-128.
- 729 **Veromann-Jurgenson, L.L., Brodribb, T.J., Niinemets, Ü. and Tosens, T.**

730 2020b. Variability in the chloroplast area lining the intercellular airspace and cell  
731 walls drives mesophyll conductance in gymnosperms. *Journal of Experimental*  
732 *Botany* **71**, 4958-4971.

733 **Veromann-Jurgenson, L.L., Tosens, T., Laanisto, L. and Niinemets, Ü.** 2017.  
734 Extremely thick cell walls and low mesophyll conductance: welcome to the world of  
735 ancient living! *Journal of Experimental Botany* **68**, 1639-1653.

736 **Wang, F., Gao, J.W., Shi, S.M., He, X.H. and Dai, T.B.** 2019. Impaired  
737 electron transfer accounts for the photosynthesis inhibition in wheat seedlings  
738 (*Triticum aestivum* L.) subjected to ammonium stress. *Physiologia Plantarum* **167**,  
739 159-172.

740 **Wang, M., Herrmann, C.J., Simonovic, M., Szklarczyk, D. and von Mering,**  
741 **C.** 2015. Version 4.0 of PaxDb: protein abundance data, integrated across model  
742 organisms, tissues, and cell-lines. *Proteomics* **15**, 3163-3168.

743 **Xie, K., Lu, Z., Pan, Y., Gao, L., Hu, P., Wang, M. and Guo, S.** 2020. Leaf  
744 photosynthesis is mediated by the coordination of nitrogen and potassium: the  
745 importance of anatomical-determined mesophyll conductance to CO<sub>2</sub> and  
746 carboxylation capacity. *Plant Science* **290**, 110267.

747 **Xiong, D., Liu, X., Liu, L., Douthe, C., Li, Y., Peng, S. and Huang, J.** 2015.  
748 Rapid responses of mesophyll conductance to changes of CO<sub>2</sub> concentration,  
749 temperature and irradiance are affected by N supplements in rice. *Plant Cell &*  
750 *Environment* **38**, 2541-2550.

## Tables

**Table 1.** Effect of different N forms on integral leaf variables

| Treatment | $M_A$ (mg cm <sup>-2</sup> ) | $V_A$ (cm <sup>3</sup> ) | $T_L$ (μm)  | $D_L$ (g cm <sup>-3</sup> ) | $A_L$ (cm <sup>2</sup> ) | Chl (mg g <sup>-1</sup> ) | $N_a$ (g m <sup>-2</sup> ) | PNUE (μmol g <sup>-1</sup> s <sup>-1</sup> ) |
|-----------|------------------------------|--------------------------|-------------|-----------------------------|--------------------------|---------------------------|----------------------------|----------------------------------------------|
| A         | 4.45±0.49a                   | 0.10±0.02b               | 114.7±10.5a | 0.36±0.06a                  | 8.43±1.48b               | 4.01±0.76a                | 1.53±0.12a                 | 9.52±1.97c                                   |
| AN        | 4.76±1.46a                   | 0.20±0.02a               | 106.5±9.6b  | 0.40±0.12a                  | 13.81±1.83a              | 4.18±0.42a                | 1.43±0.21a                 | 13.16±1.70b                                  |
| N         | 4.01±0.71a                   | 0.19±0.03a               | 108.9±9.9b  | 0.27±0.04b                  | 13.32±0.93a              | 4.36±0.60a                | 1.18±0.11b                 | 16.87±1.80a                                  |

$M_A$ , leaf mass per area;  $V_A$ , leaf volume per area;  $T_L$ , leaf thickness;  $D_L$ , leaf density;  $A_L$ , leaf area; Chl, total chlorophyll concentration per leaf;  $N_a$ , leaf nitrogen content per area; PNUE, photosynthetic nitrogen use efficiency,  $PNUE = A/N_a$ . A, AN, and N represent the sole  $NH_4^+$  supply, mixed N supply, and sole  $NO_3^-$  supply, respectively. Data are mean ± SD of 4 replications. Different letters indicate statistically significant differences ( $P < 0.05$ ).

**Table 2.** CO<sub>2</sub> transmission characteristics of *L. Japonica* affected by different N forms

| Treatment | $A$ ( $\mu\text{mol}\cdot\text{m}^{-2}\cdot\text{s}^{-1}$ ) | $g_s$ ( $\text{mol m}^{-2} \text{s}^{-1}$ ) | $C_i$ ( $\mu\text{mol mol}^{-1}$ ) | $C_c$ ( $\mu\text{mol mol}^{-1}$ ) | $C_i-C_c$ ( $\mu\text{mol mol}^{-1}$ ) | $g_m$ ( $\text{mol m}^{-2} \text{s}^{-1}$ ) | $J$ ( $\mu\text{mol m}^{-2} \text{s}^{-1}$ ) | $CE$         |
|-----------|-------------------------------------------------------------|---------------------------------------------|------------------------------------|------------------------------------|----------------------------------------|---------------------------------------------|----------------------------------------------|--------------|
| A         | 14.3±0.9b                                                   | 0.23±0.05b                                  | 277.0±14.6a                        | 160.8±13.6b                        | 107.3±16.2a                            | 0.13±0.03b                                  | 122.8±8.4b                                   | 0.070±0.005b |
| AN        | 18.1±2.5a                                                   | 0.35±0.10a                                  | 275.1±11.8a                        | 188.8±8.0a                         | 86.3±7.9b                              | 0.21±0.04a                                  | 138.3±13.4ab                                 | 0.085±0.006a |
| N         | 19.9±0.5a                                                   | 0.35±0.01a                                  | 266.8±3.1a                         | 177.7±2.0a                         | 89.1±4.2b                              | 0.22±0.01a                                  | 156.4±4.4a                                   | 0.095±0.011a |

$A$ , net photosynthetic rate;  $g_s$ , stomatal conductance;  $C_i$ , intercellular CO<sub>2</sub> concentration;  $C_c$ , chloroplast CO<sub>2</sub> concentration;  $C_i-C_c$ , CO<sub>2</sub> drawdown from sub-stomatal cavities ( $C_i$ ) to chloroplasts ( $C_c$ );  $g_m$ , mesophyll conductance;  $J$ , electron transfer rate;  $CE$ , carboxylation efficiency. A, AN, and N represent the sole NH<sub>4</sub><sup>+</sup> supply, mixed N supply, and sole NO<sub>3</sub><sup>-</sup> supply, respectively. Data are mean ± SD of 5 replications for  $A$ ,  $g_s$ ,  $C_i$ ,  $C_c$ ,  $C_i-C_c$ ,  $g_m$ ,  $J$ , and of 4 replications for  $CE$ ; Different letters indicate statistically significant differences ( $P < 0.05$ ).

**Table 3.** Leaf anatomical structure of *L. Japonica* affected by different N forms

| Treatment | $T_{mes}$ ( $\mu\text{m}$ ) | $T_{cw}$ ( $\mu\text{m}$ ) | $L_{chl}$ ( $\mu\text{m}$ ) | $T_{chl}$ ( $\mu\text{m}$ ) | $D_{chl-chl}$ ( $\mu\text{m}$ ) | $L_{cyt}$ ( $\mu\text{m}$ ) | $f_{ias}$ (%) | $S_{mes}/S$ ( $\text{m}^2 \text{m}^{-2}$ ) | $S_c/S$ ( $\text{m}^2 \text{m}^{-2}$ ) |
|-----------|-----------------------------|----------------------------|-----------------------------|-----------------------------|---------------------------------|-----------------------------|---------------|--------------------------------------------|----------------------------------------|
| A         | 83.5±7.5b                   | 0.25±0.02a                 | 6.10±0.96a                  | 2.03±0.20a                  | 1.08±0.04a                      | 0.21±0.03a                  | 17.1±4.3b     | 11.4±0.4b                                  | 6.16±0.21b                             |
| AN        | 83.5±4.1b                   | 0.22±0.03b                 | 5.54±0.47a                  | 1.98±0.22a                  | 0.72±0.03b                      | 0.20±0.03a                  | 33.4±0.03a    | 13.8±0.4a                                  | 8.96±0.20a                             |
| N         | 86.3±4.4a                   | 0.16±0.02c                 | 5.58±0.58a                  | 1.77±0.15a                  | 0.84±0.03b                      | 0.19±0.04a                  | 37.0±2.3a     | 12.8±0.4a                                  | 9.44±0.43a                             |

$T_{mes}$ , mesophyll thickness;  $T_{cw}$ , cell wall thickness;  $L_{chl}$ , chloroplast length;  $T_{chl}$ , chloroplast thickness;  $D_{chl-chl}$ , the distance between adjacent chloroplasts;  $L_{cyt}$ , the distance of chloroplast from cell wall;  $f_{ias}$ , the volume fraction of intercellular air space;  $S_{mes}/S$ , mesophyll surface area exposed to intercellular airspace per unit leaf area;  $S_c/S$ , chloroplast surface area exposed to intercellular air space per leaf area. A, AN, and N represent the sole  $\text{NH}_4^+$  supply, mixed N supply, and sole  $\text{NO}_3^-$  supply, respectively. Data are mean  $\pm$  SD with 20 microscopic pictures for  $T_{mes}$ ,  $f_{ias}$ ,  $S_{mes}/S$ ,  $S_c/S$ , and at least 30 microscopic pictures for the other ultrastructural traits; Different letters indicate statistically significant differences ( $P < 0.05$ ).



## Figure legends

**Figure 1.** Light micrographs (a, e, i, scale bar = 50  $\mu\text{m}$ ) and transmission electron micrographs (b, f, j, c, g, k, scale bar = 2  $\mu\text{m}$ ; h, scale bar = 1  $\mu\text{m}$ ; d, l, scale bar = 800 nm) of *L. Japonica* leaves affected by different forms of N, sole  $\text{NH}_4^+$  supply (Fig. a-d), mixed N supply (Fig. e-h), and sole  $\text{NO}_3^-$  supply (Fig. i-l). ias: intercellular air space; SG: starch granule; CW: cell wall; G: grana.

**Figure 2.** Correlation of the net photosynthetic rate ( $A$ ) and mesophyll conductance ( $g_m$ ) (a), stomatal conductance ( $g_s$ ) (b), electron transport rate ( $J$ ) (c), and the relationship between  $\text{CO}_2$  drawdown ( $C_i - C_c$ ) from sub-stomatal cavities ( $C_i$ ) to chloroplasts ( $C_c$ ) and  $g_m$  (d). A, AN, and N represent the sole  $\text{NH}_4^+$  supply, mixed N supply, and sole  $\text{NO}_3^-$  supply, respectively, corresponding to the symbol of the open triangles, the closed circles, and the open square in the plot. The data were fitted by linear regressions ( $P < 0.01$ ).

**Figure 3.** Relative limitation of stomatal conductance ( $l_s$ ), mesophyll diffusion ( $l_m$ ), and biochemical capacity ( $l_b$ ) of *L. Japonica* under sole  $\text{NH}_4^+$  supply (a), mixed N supply (b), and sole  $\text{NO}_3^-$  supply treatment (c), the limitation of  $l_s$ ,  $l_m$ , and  $l_b$  together add up to 100% at each treatment occasions; Quantitative limitation analyses of stomatal limitation ( $S_L$ ), mesophyll conductance limitation ( $MC_L$ ), and biochemical limitation ( $B_L$ ) of *L. Japonica* photosynthesis under sole  $\text{NH}_4^+$  supply (d), the data outside the circles represent the absolute quantitative limitations and the data inside the circles represent the share of the total limitations by  $S_L$ ,  $MC_L$ , and  $B_L$ .

**Figure 4.** Anatomical limitations of mesophyll conductance ( $g_m$ ) (a) and the share of the overall  $g_m$  limitation (b) by cell wall (cw), plasma membrane (pl), chloroplast envelope (env), stroma (st), and cytoplasm (cyt) in leaves of *L. Japonica* under different forms of N. A, AN, and N represent the sole  $\text{NH}_4^+$  supply, mixed N supply, and sole  $\text{NO}_3^-$  supply, respectively. The inset figures showed the anatomical limitations of  $g_m$  and the share of the overall  $g_m$  limitation by gas-phase and liquid-phase. Different letters indicate statistically significant differences ( $P < 0.05$ ).

**Figure 5.** Correlations of mesophyll conductance ( $g_m$ ) with the intercellular air space ( $f_{ias}$ ) (a), the volume fraction of cell wall thickness ( $T_{cw}$ ) (b), the chloroplast

---

surface area exposed to intercellular air space per leaf area ( $S_c/S$ ) (**c**), and mesophyll thickness ( $T_{mes}$ ) (**d**). A, AN, and N represent the sole  $\text{NH}_4^+$  supply, mixed N supply, and sole  $\text{NO}_3^-$  supply, respectively, corresponding to the symbol of the open triangles, the closed circles, and the open square in the plot. The data of each group was fitted by linear regressions ( $P < 0.01$ ).

**Figure 6.** A schematic model of *L. Japonica* leaf anatomical traits and  $\text{CO}_2$  diffusion pathway under different forms of N supply. Leaf ultrastructure model in sole  $\text{NH}_4^+$  supply (**a**), mixed N supply (**b**), and sole  $\text{NO}_3^-$  supply (**c**), respectively.  $\text{CO}_2$  diffusion pathways inside the mesophyll cells in sole  $\text{NH}_4^+$  supply, mixed N supply, and sole  $\text{NO}_3^-$  supply, respectively (**d**). The chloroplast surface area exposed to intercellular air space per leaf area ( $S_c/S$ ) was outlined with yellow lines in (b), and the mesophyll surface area exposed to intercellular airspace per unit leaf area ( $S_{mes}/S$ ) was marked with purple lines in (c). The loose arrangement of mesophyll cells as affected by sole  $\text{NO}_3^-$  supply increased the intercellular airspace and consequently up-regulated the  $S_c/S$  and  $S_{mes}/S$  (**b**, **c**). Increased chloroplast density resulted in reduced distance between two adjacent chloroplasts ( $D_{chl-chl}$ ) in sole  $\text{NO}_3^-$ -fed leaves (**c**). The red folded lines and black folded lines represent the strength of  $\text{CO}_2$  diffusion resistance into the cell from cell wall ( $g_{cw}$ ), plasma ( $g_{pl}$ ), cytoplasm ( $g_{cyt}$ ), envelope ( $g_{env}$ ) and stroma ( $g_{st}$ ), while the red folded lines indicated the values of this component differed between treatments and the black folded lines means no difference between treatments or not been measured in the study (**d**). The blue dot represents the  $\text{CO}_2$  concentration (**d**).  $T_L$ , leaf thickness; W, the width of the leaf section; cw, cell wall; pl, plasm; c, chloroplast.

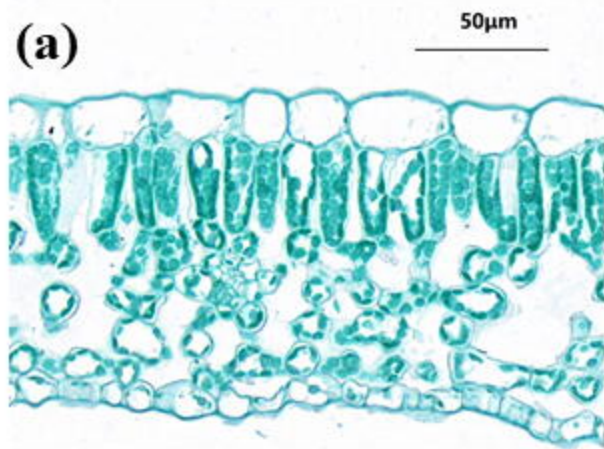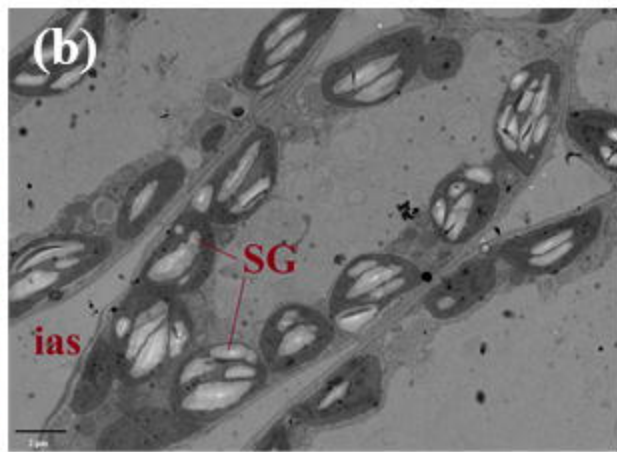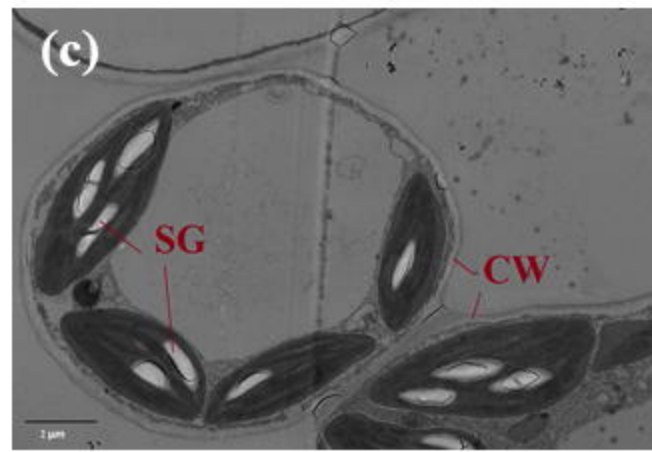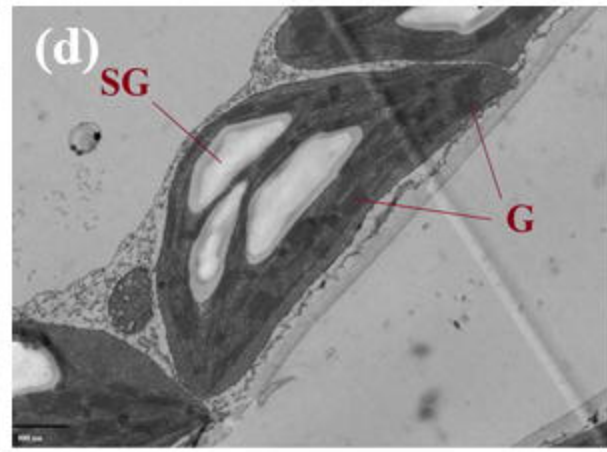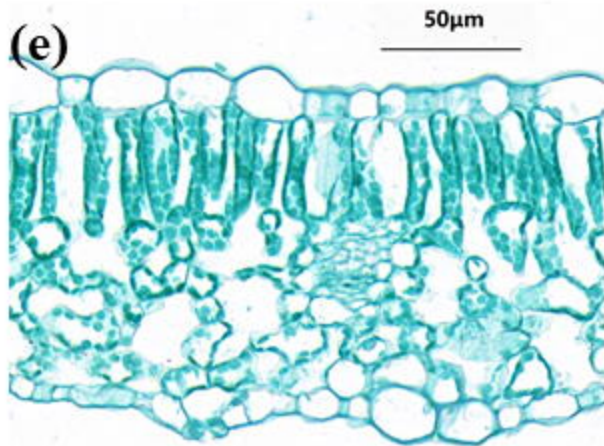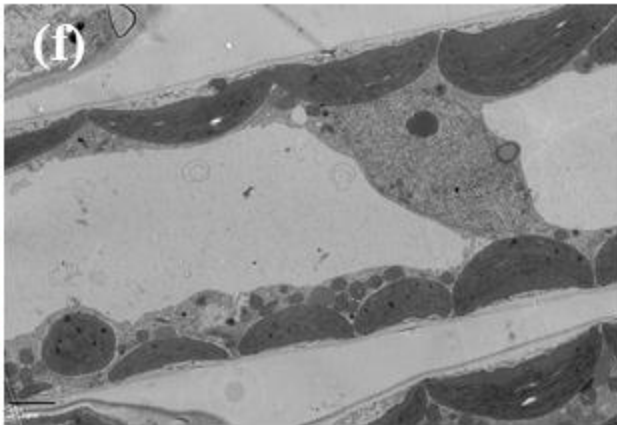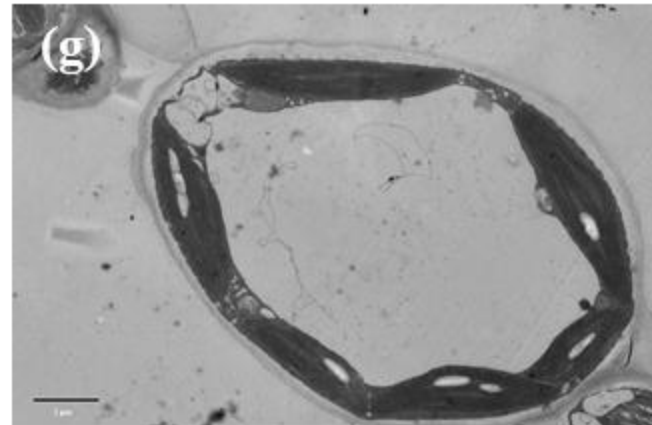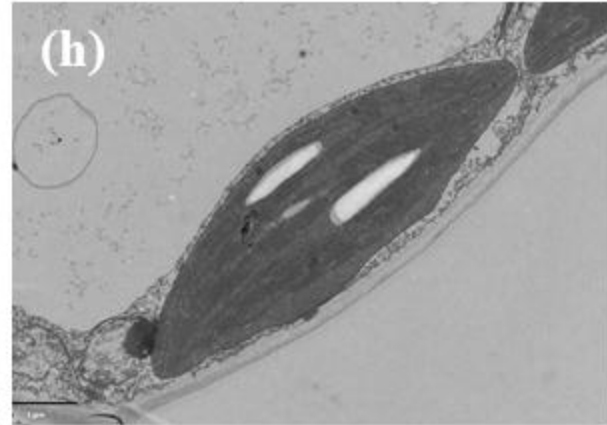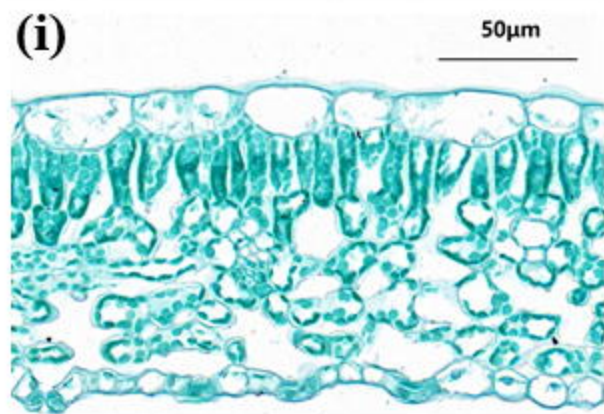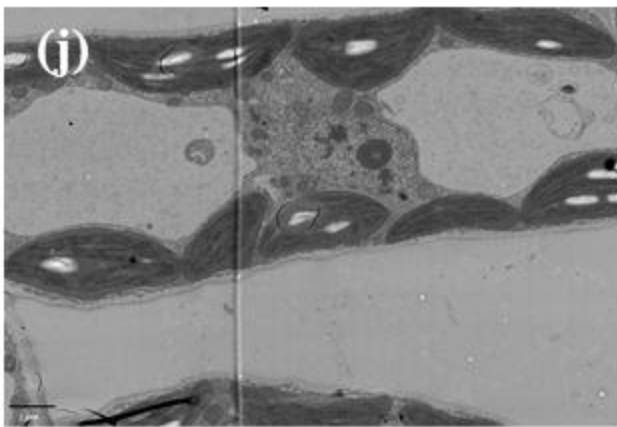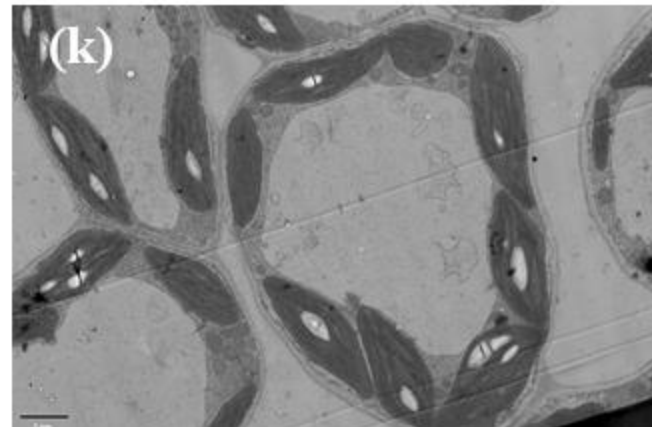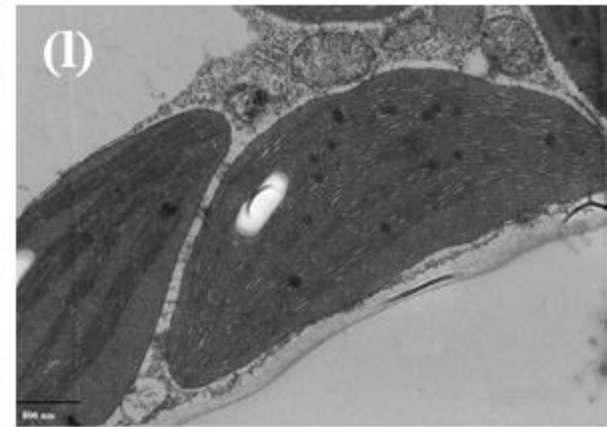

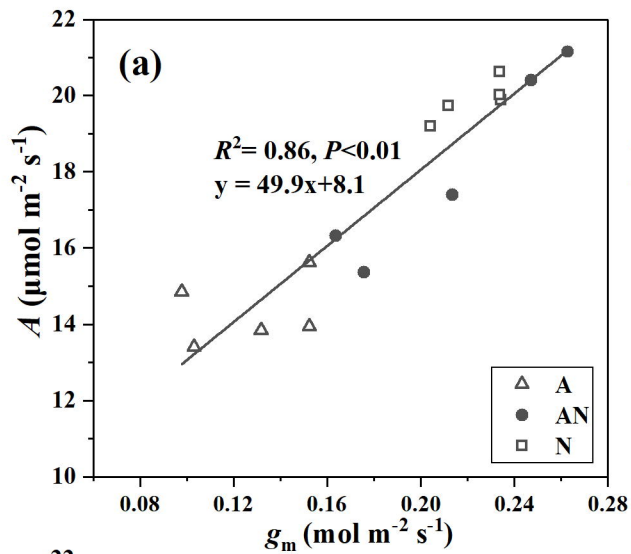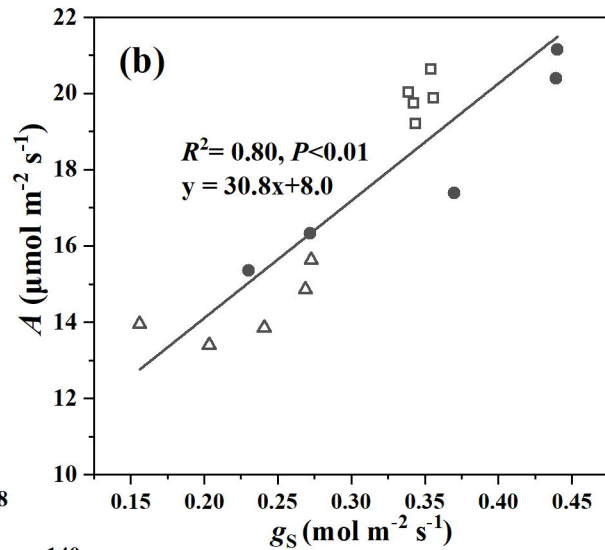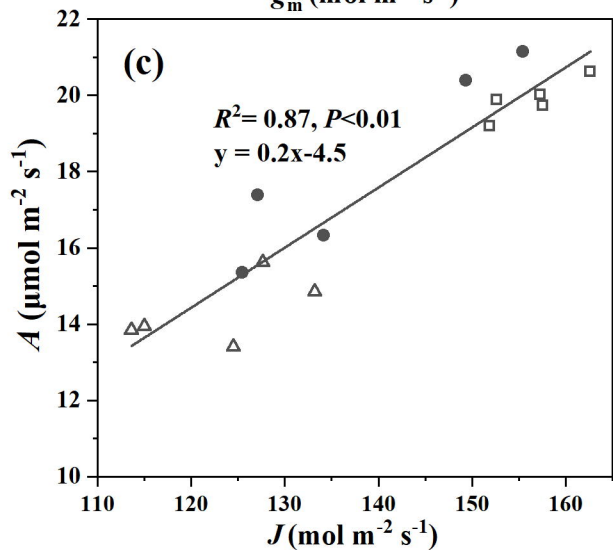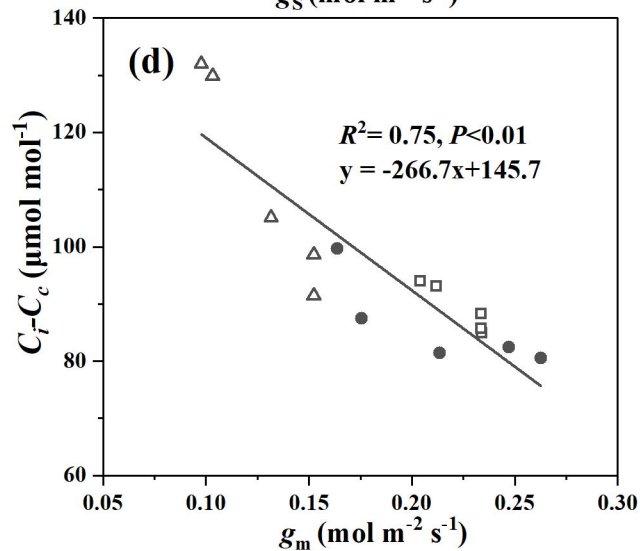



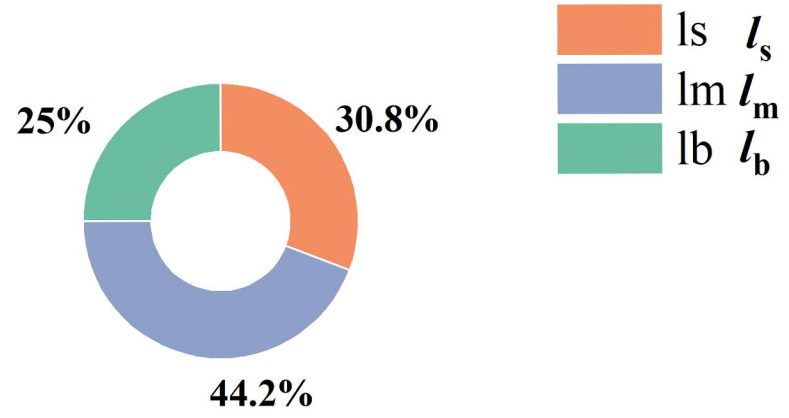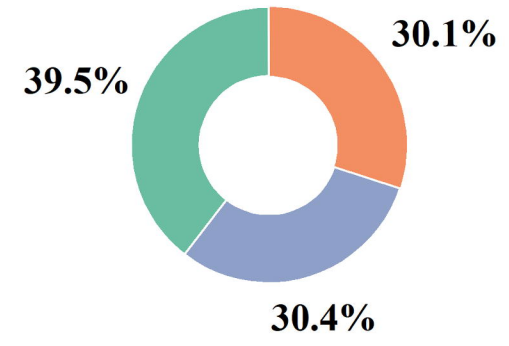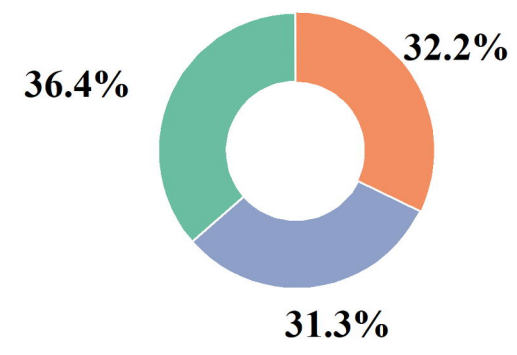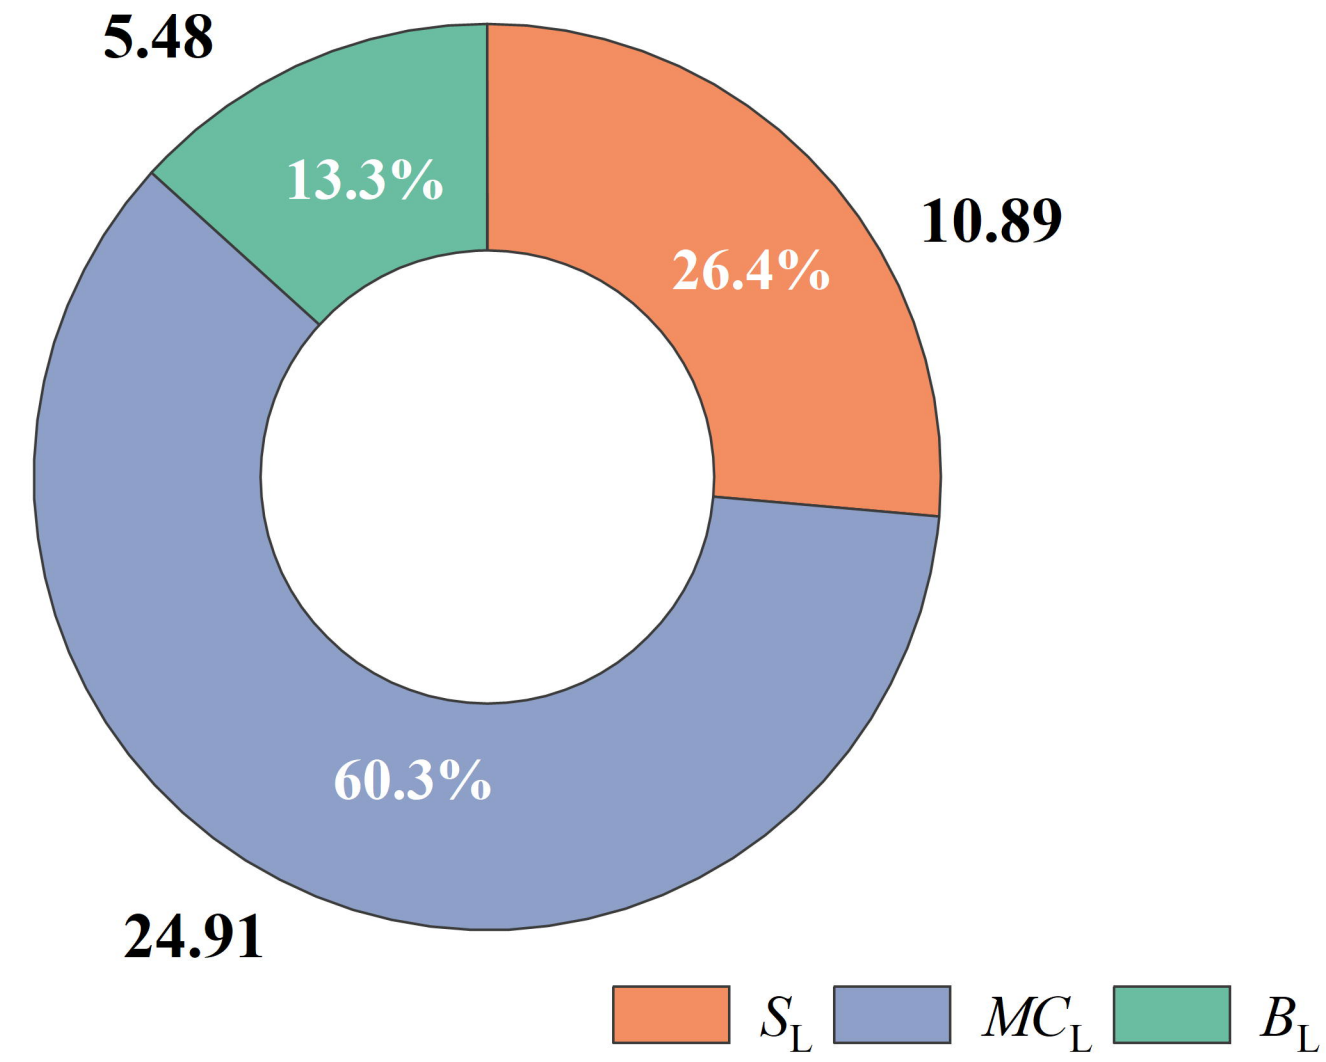



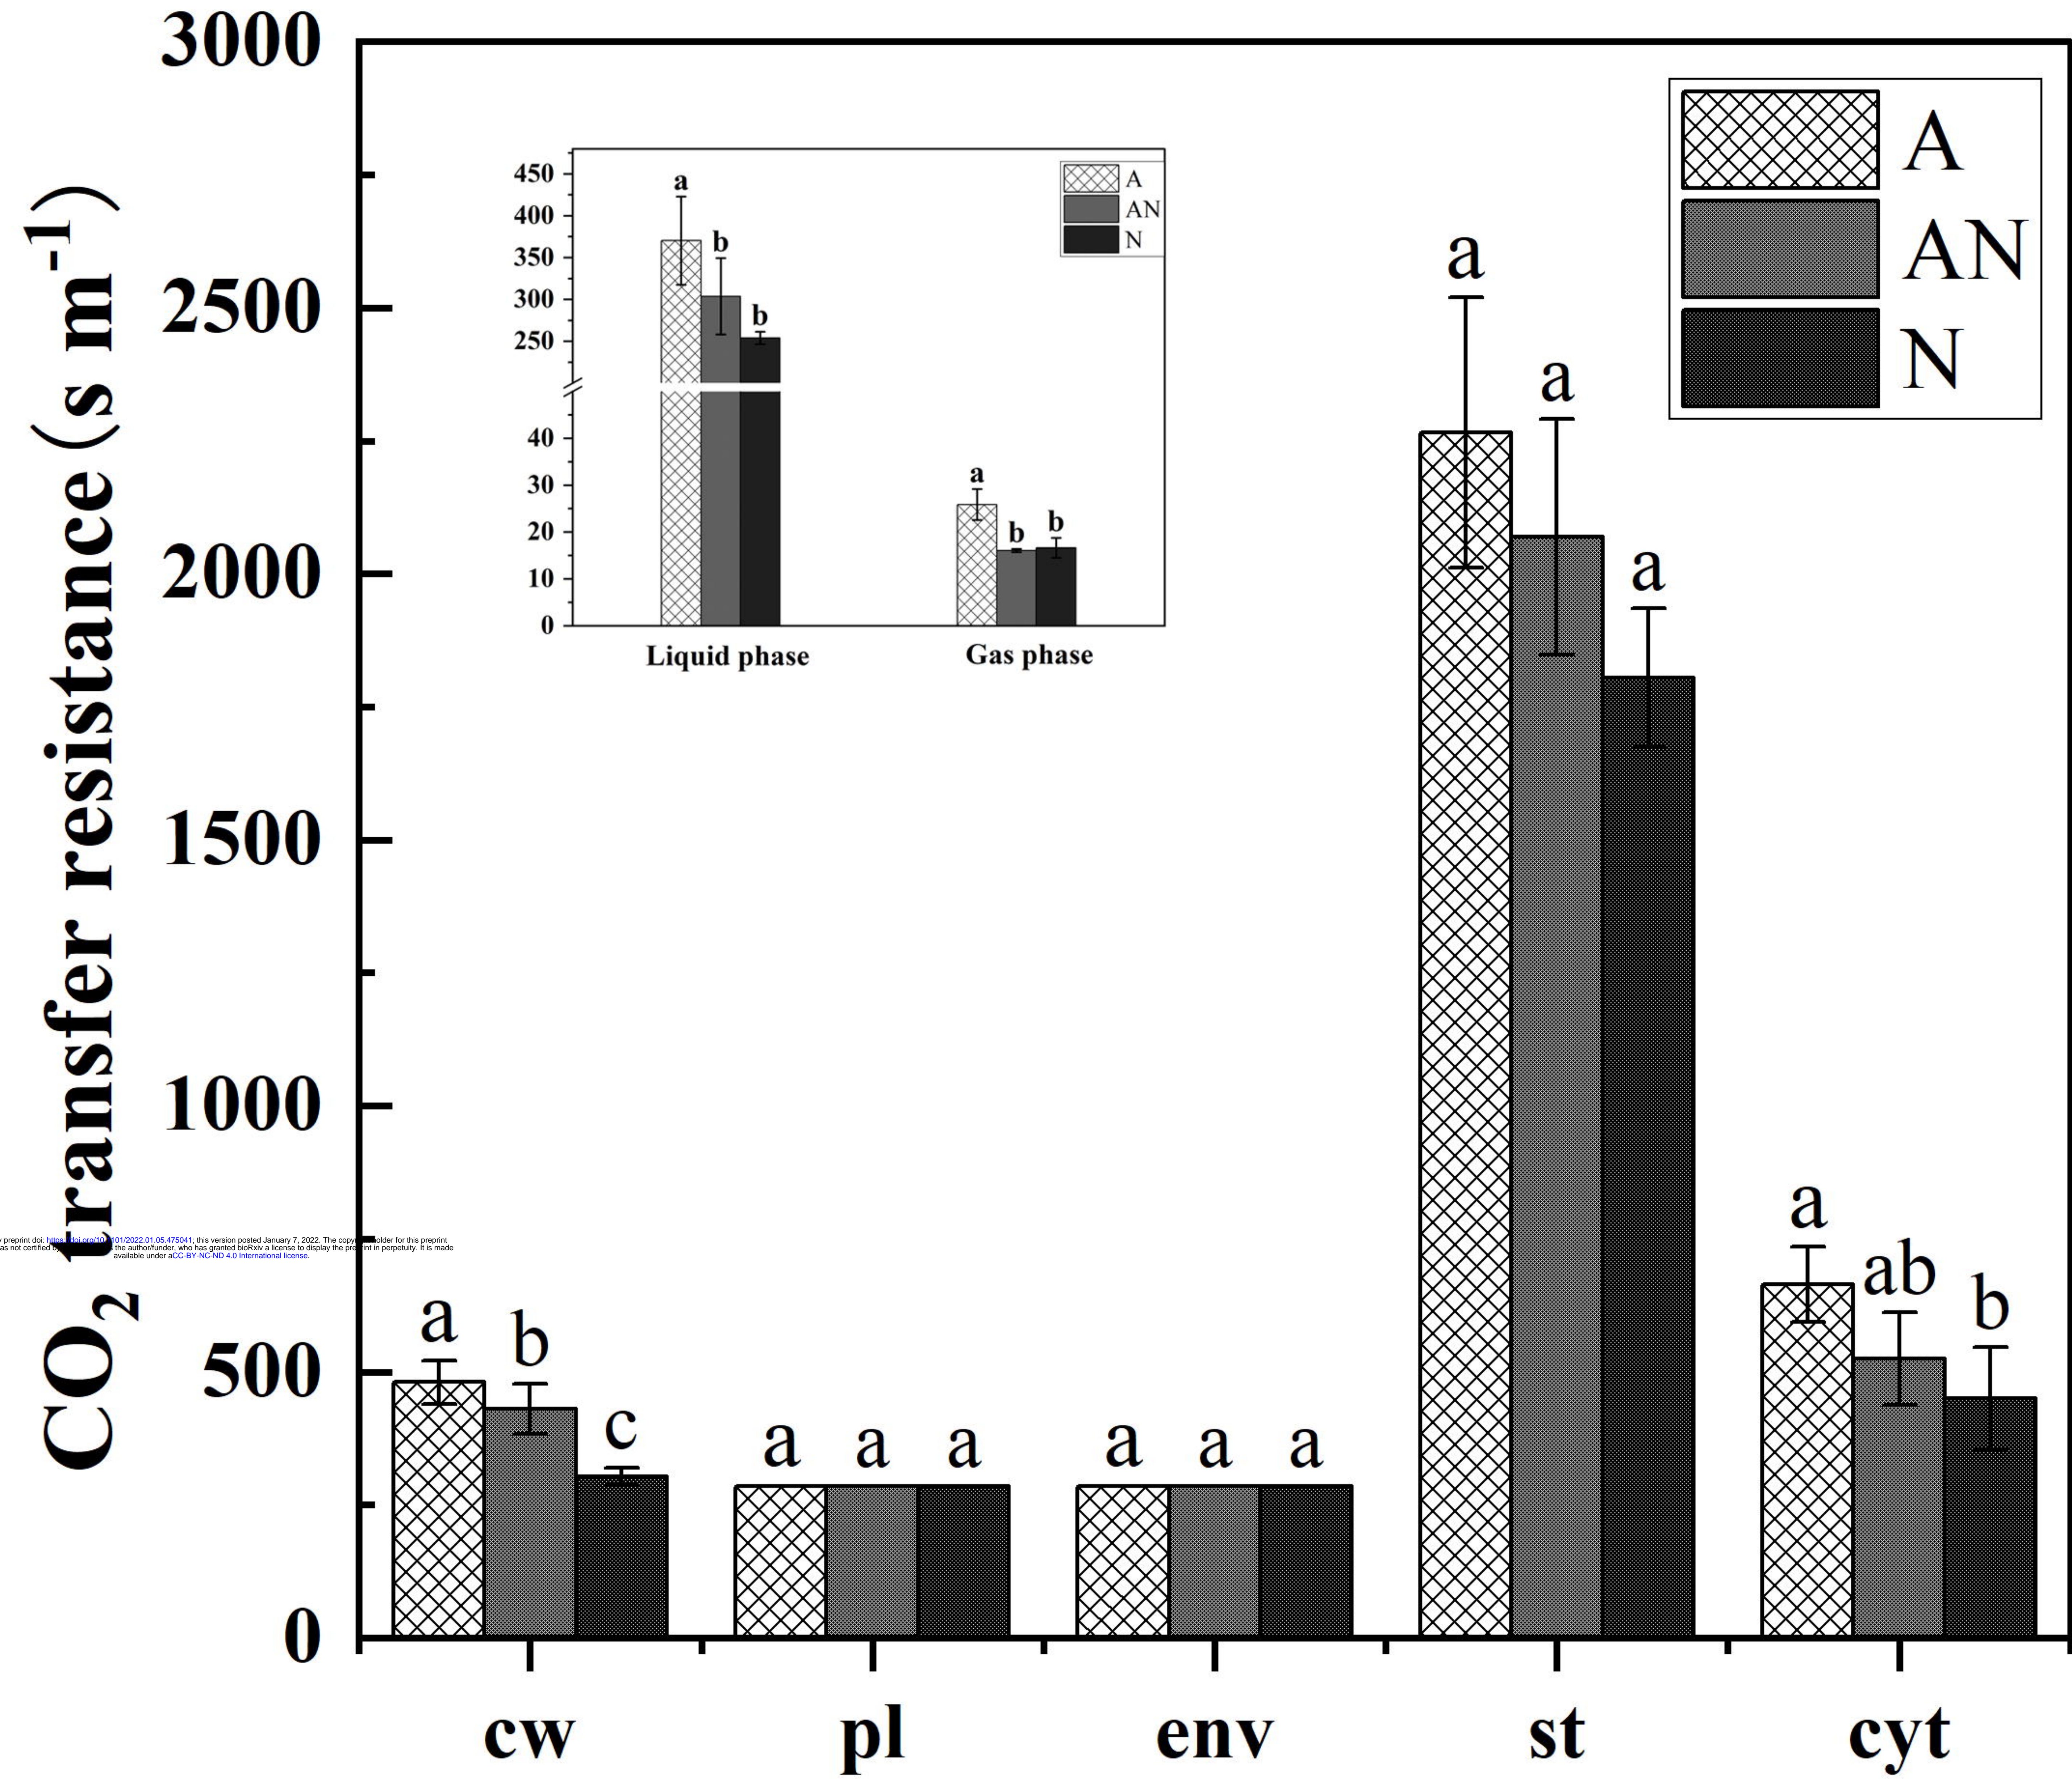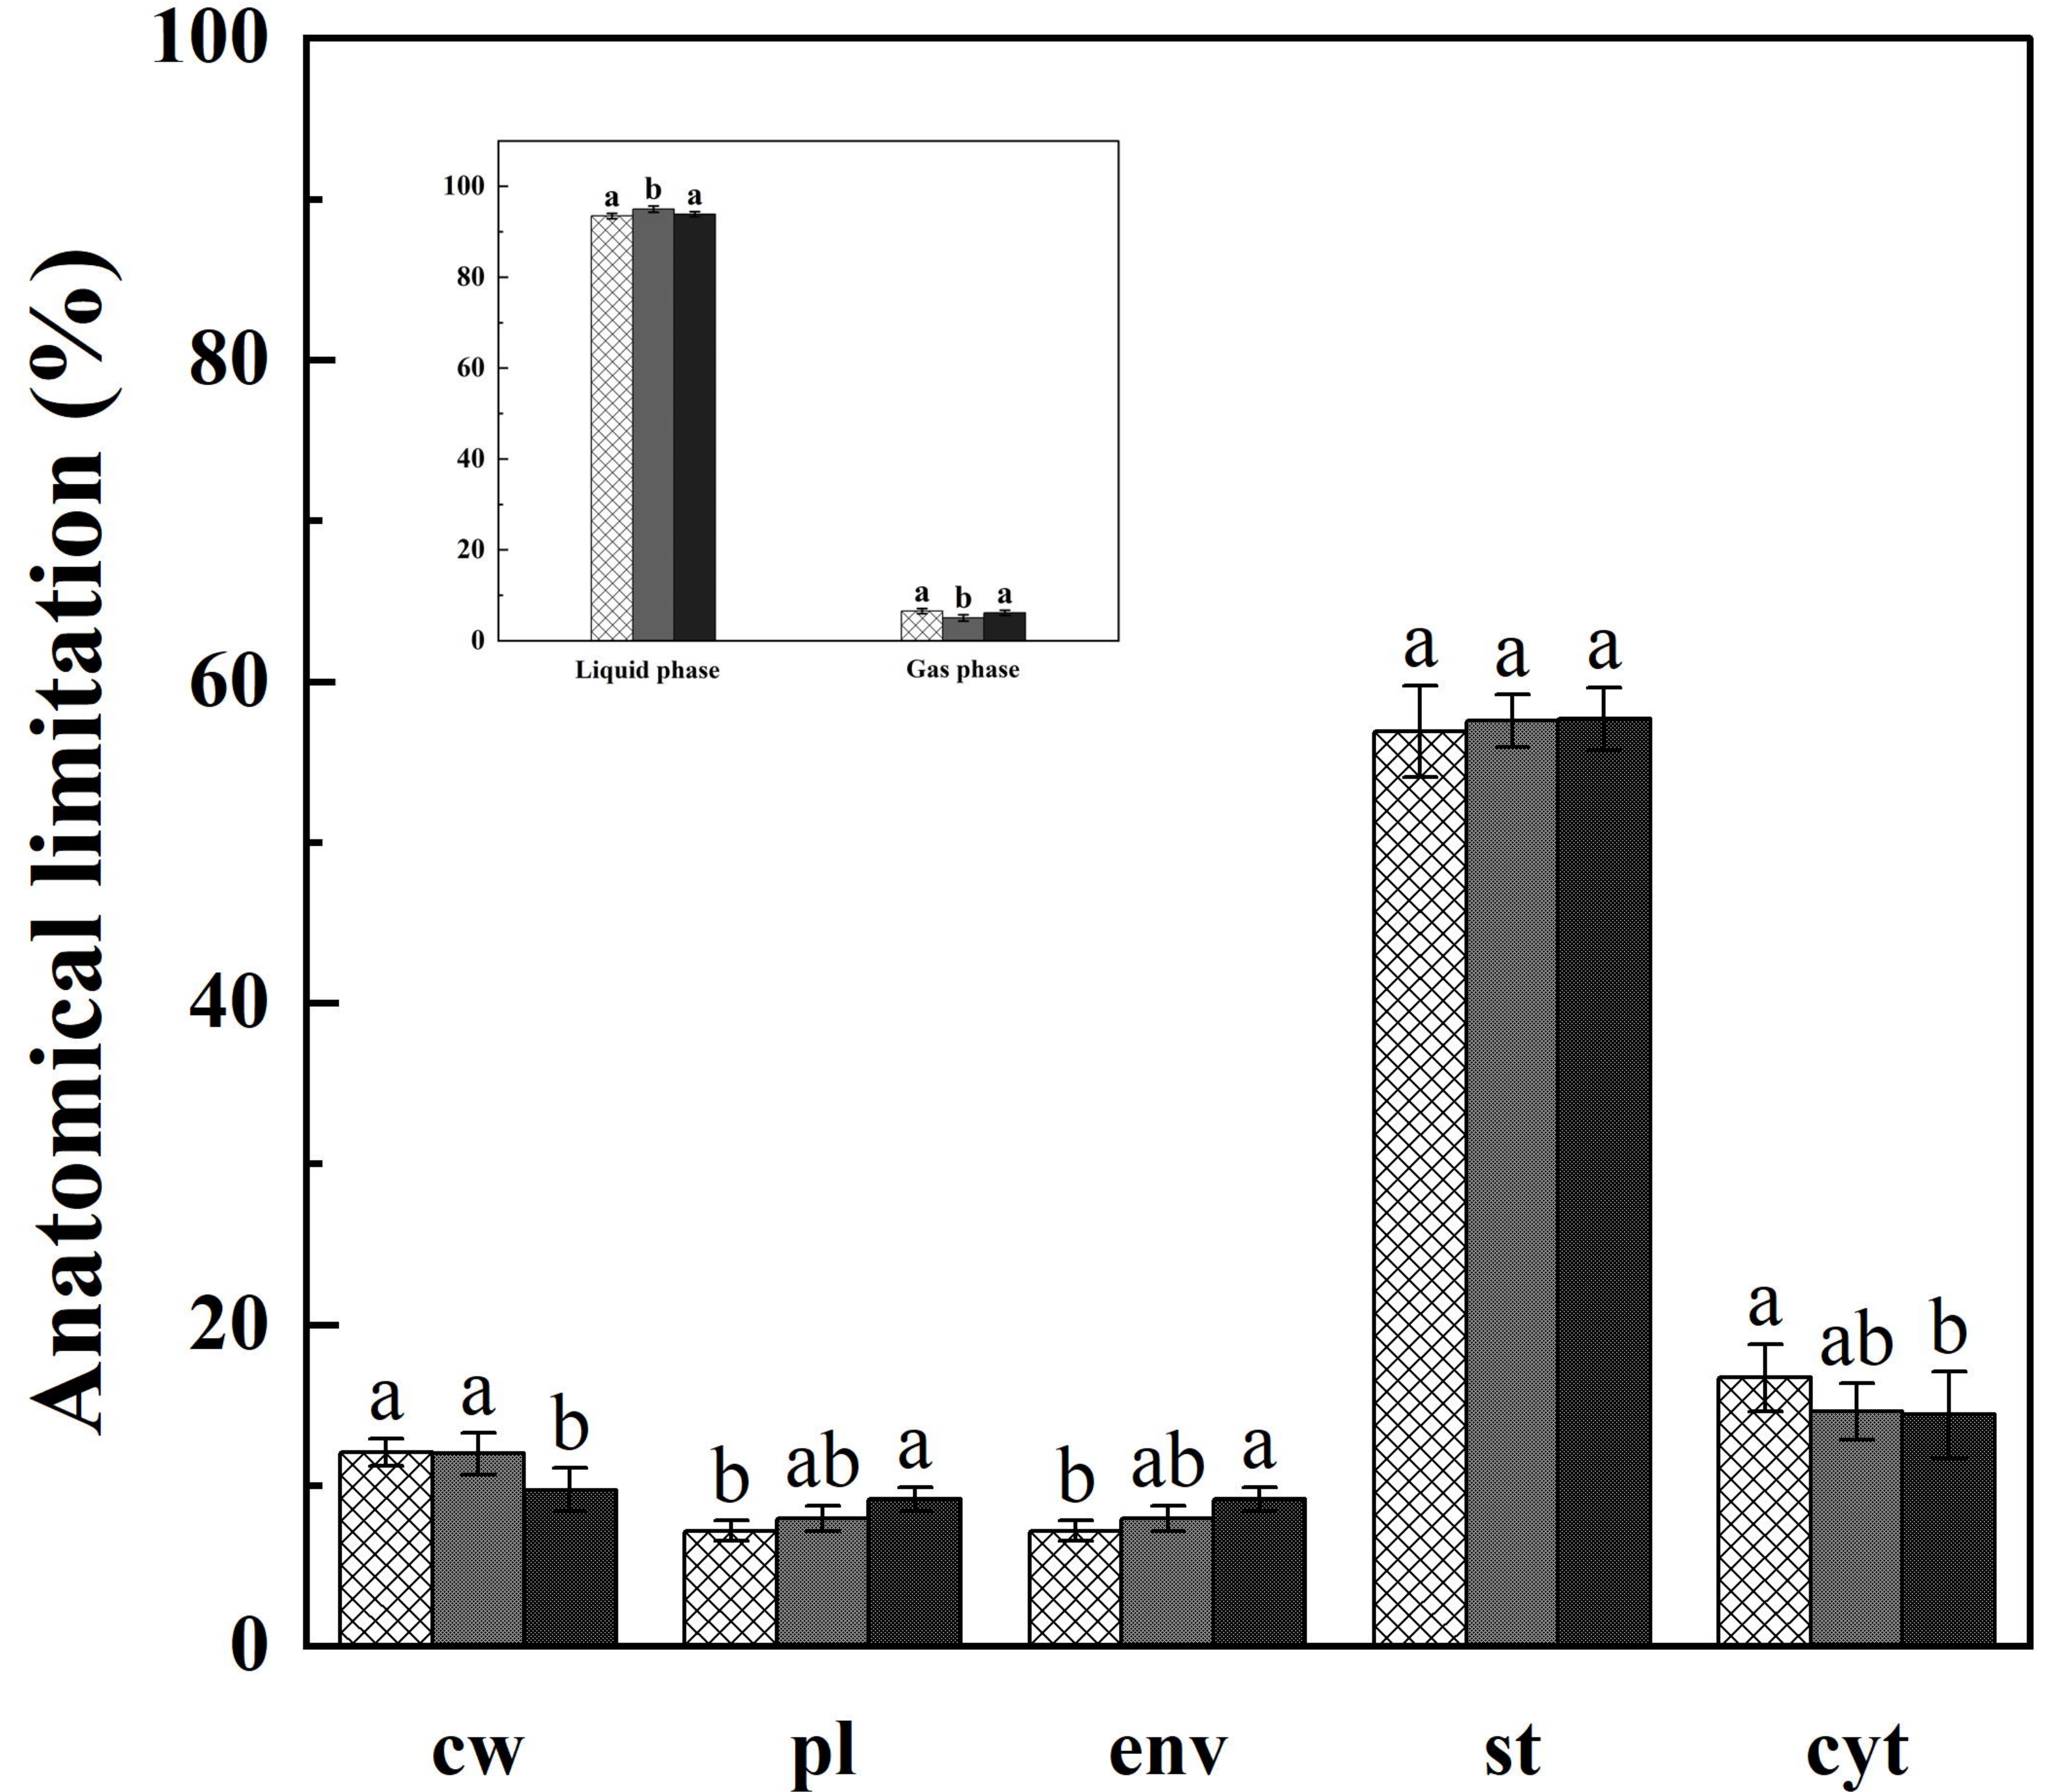



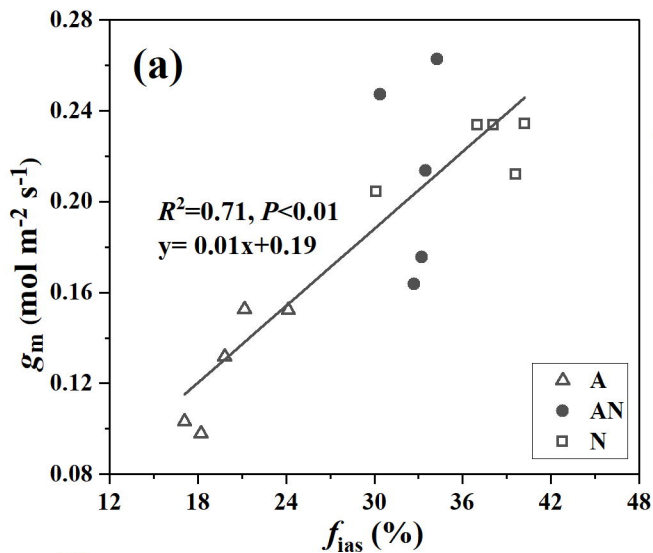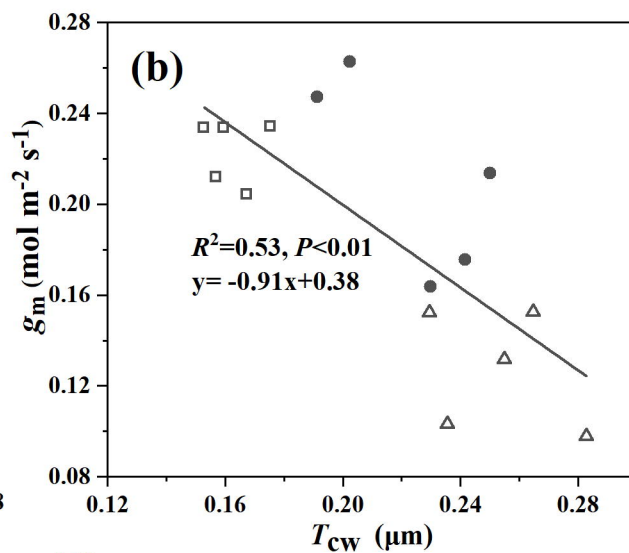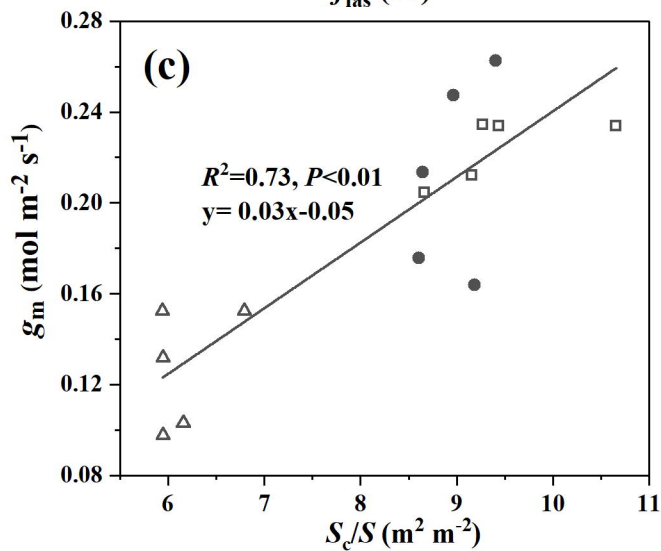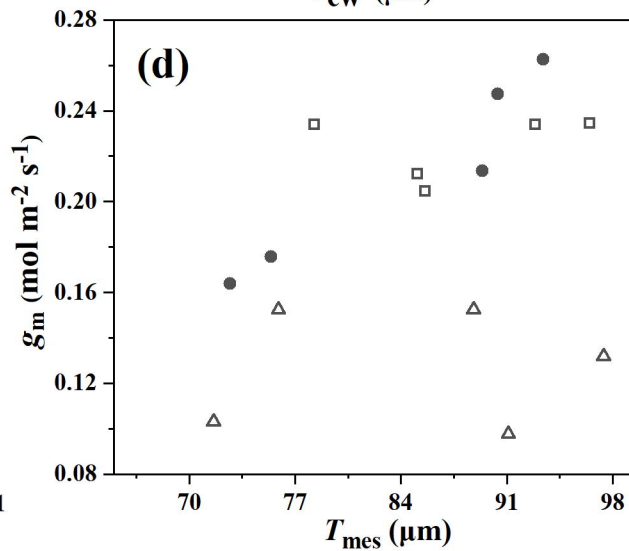

Sole  $\text{NH}_4^+$  supply

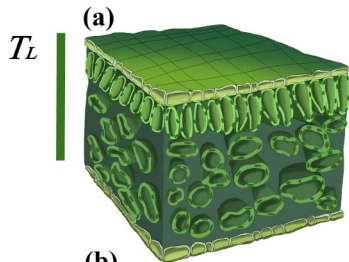

Mixed N supply

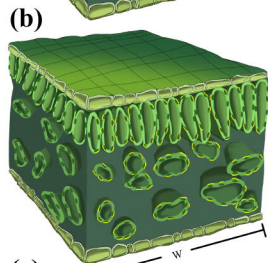

Sole  $\text{NO}_3^-$  supply

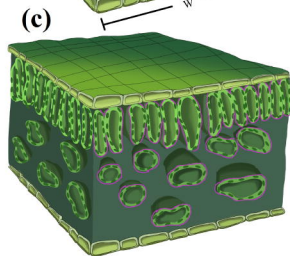

(d)

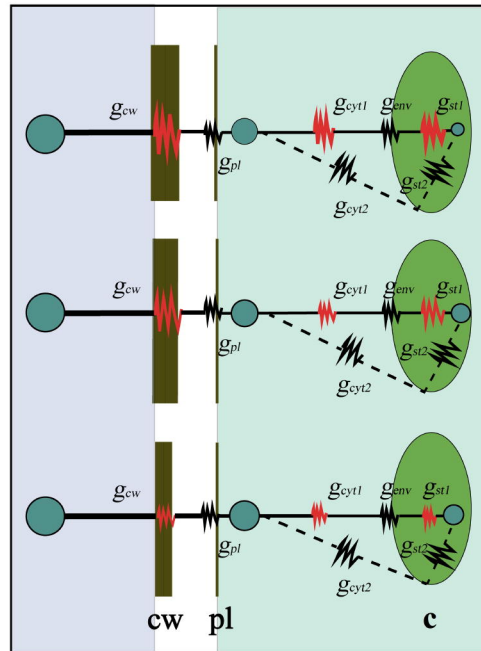

Source: https://www.biorxiv.org/content/10.1101/2022.01.05.475041v1.full.pdf
